1 **Conservation of epigenetic regulation by the MLL3/4 tumour suppressor**  
2 **in planarian pluripotent stem cells**

3

4 **Yuliana Mihaylova<sup>1#</sup>, Prasad Abnave<sup>1#</sup>, Damian Kao<sup>1</sup>, Samantha Hughes<sup>2</sup>,**  
5 **Alvina Lai<sup>1</sup>, Farah Jaber-Hijazi<sup>3</sup>, Nobuyoshi Kosaka<sup>1</sup>, and A. Aziz**  
6 **Aboobaker<sup>1\*</sup>**

7

8 **1. Department of Zoology, Tinbergen Building, South Parks Road,**  
9 **Oxford OX1 3PS, United Kingdom**

10

11 **2. HAN University of Applied Sciences, Institute of Applied Sciences,**  
12 **Laan van Scheut 2, 6525EM, Nijmegen, The Netherlands**

13

14 **3. Beatson Institute for Cancer Research, Switchback Road, Bearsden,**  
15 **Glasgow G61 1BD**

16

17 **#These authors contributed equally.**

18

19 **\*Author for correspondence**

20 **Aziz.Aboobaker@zoo.ox.ac.uk**

21

22 **Abstract (150 words)**

23 Currently, little is known about the evolution of epigenetic regulation in  
24 animal stem cells. Using the planarian stem cell system to investigate the  
25 role of the COMPASS family of MLL3/4 histone methyltransferases, we  
26 demonstrate that their role as tumour suppressors in stem cells is  
27 conserved over a large evolutionary distance in animals. This also  
28 suggested the potential conservation of a genome wide epigenetic  
29 regulation program in animal stem cells, so we assessed the regulatory  
30 effects of MLL3/4 loss of function by performing RNA-seq and CHIP-seq on  
31 the G2/M planarian stem cell population, part of which contributes to the  
32 formation of outgrowths. We find many oncogenes and tumour suppressors  
33 among the affected genes that are therefore likely candidates for mediating  
34 MLL3/4 tumour suppression function in mammals, where little is known  
35 about *in vivo* regulatory targets. Our work demonstrates conservation of an  
36 important epigenetic regulatory program in animals and highlights the utility  
37 of the planarian model system for studying epigenetic regulation.

38

## 39 Introduction

40 The pluripotent adult stem cell population of planarian flatworms is a highly  
41 accessible study system to elucidate fundamental aspects of stem cell  
42 function<sup>1,2</sup>. These stem cells, collectively known as neoblasts (NBs), bestow  
43 these animals with an endless capacity to regenerate all organs and tissues  
44 after amputation. Comparisons of stem cell expression profiles and functional  
45 data between animals show that some key aspects of stem cell biology are  
46 deeply conserved<sup>3-9</sup>, while others, like the transcription factors that define  
47 pluripotency in mammalian stem cells, appear not to be. Thus, studies of NBs  
48 have the potential to inform us about the origins of fundamental stem cell  
49 properties that underpin metazoan evolution, such as maintenance of genome  
50 stability<sup>10</sup>, self-renewal<sup>7,11</sup>, pluripotency<sup>12-15</sup>, differentiation<sup>16-18</sup> and  
51 migration<sup>19,20</sup>. All of these are highly relevant to understanding human disease  
52 processes, particularly those leading to cancer.

53 Currently, very little comparative data exists for the role of epigenetic  
54 regulation in animal stem cells. Planarian NBs offer an opportunity to ask  
55 whether the cellular and physiological roles of different epigenetic regulators  
56 might be conserved between mammalian and other animal stem cells.  
57 Additionally, as mutations in many chromatin modifying enzymes are  
58 implicated in cancer<sup>21-26</sup>, using NBs as a model system may provide  
59 fundamental insight into why these mutations lead to cancer if epigenetic  
60 regulatory programs are conserved.

61 The genome-wide effects of chromatin modifying enzymes make  
62 understanding how they contribute to cancer phenotypes very challenging.  
63 Complexity in the form of tissue and cell heterogeneity, life history stage and  
64 stage of pathology make resolution of epigenetic regulatory cause and effect  
65 relationships *in vivo* very challenging. From this perspective, planarians and  
66 their easily accessible NB population may be a very useful model system. The  
67 planarian system could be particularly suitable for investigating the early  
68 transformative changes in stem cells at the onset of hyperplasia, as the NB  
69 identity of all potentially hyperplastic cells is known *a priori*. Here, we have  
70 employed this approach to study the planarian orthologs of the human tumour  
71 suppressors Mixed Lineage Leukaemia 3 (MLL3) and MLL4.

72 The human MLL proteins are the core members of the highly conserved  
73 COMPASS-like (complex of proteins associated with Set1) H3K4 methylase  
74 complexes. An extensive research effort has now established the evolutionary  
75 history and histone modifying activities of this protein family (**Supplementary**  
76 **Figure 1**<sup>27-42</sup>). Perturbation of MLL-mediated H3K4 methylase activity is  
77 characteristic of numerous cancer types. While prominent examples include  
78 the translocation events widely reported in leukaemias involving the *Mll1*  
79 gene<sup>43-46</sup>, the mutation rate of *Mll3* across malignancies of different origin  
80 approaches 7%, making *Mll3* one of the most commonly mutated genes in  
81 cancer<sup>24</sup>. In attempts to model the role of *Mll3* in cancer, mice homozygous for  
82 a targeted deletion of the *Mll3* SET domain were found to succumb to ureter  
83 epithelial tumours at high frequency<sup>32</sup>, an effect enhanced in a *p53*<sup>+/-</sup>  
84 mutational background. Heterozygous deletions of *Mll3* in mice also lead to  
85 acute myeloid leukaemia, as hematopoietic stem cells fail to differentiate  
86 correctly and over-proliferate, implicating *Mll3* in dose-dependent tumour  
87 suppression<sup>26</sup>. Recent studies have revealed an increasingly complicated  
88 molecular function of MLL3, its closely related paralog MLL4, and their partial  
89 *Drosophila* orthologs – LPT (Lost PHD-fingers of triThorax-related;  
90 corresponding to the N-terminus of MLL3/4) and Trr (triThorax-related;  
91 corresponding to the C-terminus of MLL3/4)<sup>35,39</sup>. LPT-Trr/MLL3/4 proteins  
92 have a role in transcriptional control via mono-methylating and/or tri-  
93 methylating H3K4 at promoters and enhancers<sup>29,31,33-35,40,47,48</sup>  
94 (**Supplementary Figure 1**).

95 Links between mutations in *Mll3/4*, effects on downstream targets of MLL3/4  
96 and human cancers remain to be elucidated. If the role of MLL3/4 in  
97 regulating stem cells is conserved in NBs, planarians could provide an  
98 informative *in vivo* system for identifying potential candidate target genes that  
99 drive tumour formation. Here we identify and investigate the role of *Mll3/4*  
100 orthologs in the planarian *Schmidtea mediterranea*, and show knockdown  
101 leads to NB over proliferation, tissue outgrowths containing proliferative NBs  
102 and differentiation defects. Investigating the regulatory effects accompanying  
103 this phenotype, we demonstrate mis-regulation of both oncogenes and tumour

104 suppressors, providing a potential explanation for how tumour suppressor  
105 function is mediated by MLL3/4.

106

## 107 **Results**

### 108 **The planarian orthologs of *Mll3/4* are expressed in stem cells**

109 We found 3 partial orthologs of mammalian *Mll3* and *Mll4* genes. We named  
110 the planarian gene homologous to *Drosophila* LPT and the N-terminus of  
111 mammalian *Mll3/4* - *Smed-LPT* (KX681482) (**Supplementary Figure 2a**).  
112 *Smed-LPT* (LPT) protein contains two PHD-fingers and a PHD-like zinc-  
113 binding domain, suggesting that it has chromatin-binding properties<sup>49</sup> (**Figure**  
114 **1a**). There are two planarian genes homologous to *Drosophila* Trr and the C-  
115 terminus of mammalian *Mll3/4* – *Smed-trr-1* (KC262345) and *Smed-trr-2*  
116 (DN309269, HO004937), both previously described<sup>36</sup>. Both SMED-TRR-1 and  
117 SMED-TRR-2 contain a PHD-like zinc-binding domain, a FYRN (FY-rich N-  
118 terminal domain), FYRC (FY-rich C-terminal domain) and a catalytic SET  
119 domain. SMED-TRR-1 (TRR-1) contains only a single NR (Nuclear Receptor)  
120 box at a non-conserved position and SMED-TRR-2 (TRR-2) has no NR boxes  
121 (**Figure 1a**). This could indicate some functional divergence exists between  
122 TRR-1 and TRR-2, where only TRR-1 is capable of interacting with nuclear  
123 receptors.<sup>33,35,50,51</sup>

124 We performed whole-mount *in situ* hybridization (WISH) and found that *LPT*,  
125 *trr-1* and *trr-2* are broadly expressed across many tissues and organs.  
126 Gamma irradiation to remove cycling cells in *S. mediterranea* revealed that  
127 the three transcripts are also likely to be expressed in NBs (**Figure 1b**). A  
128 double fluorescent *in situ* hybridization (FISH) with the pan-stem cell marker  
129 *Histone 2B* (*H2B*) confirmed that over 90% of all NBs co-express *LPT*, *trr-1*  
130 and *trr-2* (**Figure 1c-d**). The genes also showed clear expression in the brain,  
131 pharynx and other differentiated tissues (**Figure 1b**).

132

### 133 **Loss of *Mll3/4* function leads to regeneration defects and tissue** 134 **outgrowths**

135 In order to study the function of planarian *Mll3/4*, we investigated phenotypes  
136 after RNAi-mediated knockdown. Following *LPT*(RNAi), there was a clear  
137 failure to regenerate missing structures, including the eyes and pharynx, with  
138 regenerative blastemas smaller than controls (**Figure 2a-b**). After 7 days of  
139 regeneration we observed that, as well as failure to regenerate missing  
140 structures, animals began to form tissue outgrowths (**Figure 2c**). Intact  
141 (homeostatic) *LPT*(RNAi) animals also developed outgrowths, but at a lower  
142 frequency than regenerates (**Figure 2d**).

143 Following individual knockdown of *trr-1* and *trr-2*, milder differentiation defects  
144 were observed compared to *LPT*(RNAi), with no obvious outgrowths  
145 (**Supplementary Figure 2b-d**), confirming results from an earlier study<sup>36</sup>.  
146 However, *trr-1/trr-2* double knockdown recapitulated the phenotype of  
147 *LPT*(RNAi), but with higher penetrance and increased severity  
148 (**Supplementary Figure 2e,f**). Functional redundancy between the two *trr*  
149 paralogs likely accounts for the reduced severity after individual knockdown.  
150 Double knockdown animals all developed outgrowths and started dying at day  
151 5 post-amputation. Based on these observations, we decided to focus our  
152 attention on the *LPT*(RNAi) phenotype as regeneration defects and the  
153 formation of tissue outgrowths were temporally distinct and could be studied  
154 consecutively.

155 A more thorough study of the differentiation properties of *LPT*(RNAi) animals  
156 following amputation showed that the triclad gut structure failed to regenerate  
157 secondary and tertiary branches and to extend major anterior and posterior  
158 branches (**Figure 2e**). Cephalic ganglia (CG) regenerated as smaller  
159 structures, the two CG lobes did not join in their anterior ends in *LPT*(RNAi)  
160 animals (**Figure 2f**) and the optic chiasm and optic cups were mis-patterned  
161 and markedly reduced (**Figure 2g-h**). We found that 80% of *LPT*(RNAi)  
162 animals did not regenerate any new pharyngeal tissue (**Figure 2i**). We  
163 interpreted these regenerative defects as being indicative of either a broad  
164 failure in stem cell maintenance and/or differentiation.

165

166 **LPT/trr-1/trr-2 function is required for correct differentiation of epidermal**  
167 **and neural lineages**

168 One of the structures most severely affected following loss of *LPT* function  
169 was the brain so we looked at the regeneration of different neuronal subtypes.  
170 *LPT*(RNAi) animals had reduced numbers of GABAergic (**Figure 3a**),  
171 dopaminergic (**Figure 3b**), acetylcholinergic (**Figure 3c**) and serotonergic  
172 (**Figure 3d**) neurons. Brain defects were milder following knockdown of either  
173 *trr-1* or *trr-2* in agreement with the hypothesis of some functional redundancy  
174 between these paralogs (**Supplementary Figure 3a-d**).

175 Epidermal tissue was also affected. Both early (*Prog-1*<sup>+ve</sup> cells) and late  
176 (*AGAT-1*<sup>+ve</sup> cells) epidermal progeny were significantly decreased, but not  
177 entirely absent, in *LPT*(RNAi) regenerating animals (**Figure 3e**). No such  
178 defect was seen in individual *trr-1* and *trr-2* knockdown animals  
179 (**Supplementary Figure 3e**).

180 These effects along with defects in pharynx and gut tissues implicate broad  
181 NB differentiation defects in *LPT*(RNAi) animals.

182

### 183 **LPT limits normal stem cell proliferation and tissue growth**

184 Aside from impairment of regeneration following *LPT*(RNAi), the other major  
185 phenotype we observed were outgrowths of tissue that appeared at  
186 unpredictable positions in regenerating pieces.

187 Planarian regeneration is characterized by an early burst of increased NB  
188 proliferation, 6-12 hours after wounding, and a second peak of proliferation,  
189 48 hours after amputation<sup>52</sup>. Following *LPT*(RNAi), we observed significant  
190 increases in proliferation at both of these peaks and at 8 days post-  
191 amputation, as proliferation failed to return to normal homeostatic levels  
192 (**Figure 4a**). It was previously reported that *Trr-1*(RNAi) leads to decreases in  
193 mitotic cells, whereas *Trr-2*(RNAi) doesn't affect NB proliferation<sup>36</sup>.

194 In 8 day-regenerating *LPT*(RNAi) worms the observed over-proliferation is a  
195 result of localized clusters of mitotic cells rather than broad increase in  
196 proliferation across regenerating animals (**Figure 4b**). This is different from  
197 previously reported planarian outgrowth phenotypes from our group and  
198 others, where hyperplastic stem cells are evenly distributed<sup>53,54</sup>. It seems  
199 likely that these mitotic clusters might eventually be responsible for the

200 formation of outgrowths. When we looked at outgrowths, we found mitotic  
201 cells usually restricted to mesenchymal tissue, had penetrated into epidermal  
202 outgrowths in *LPT*(RNAi) animals (**Figure 4c**).

203 In order to understand if ectopically cycling NBs represented the breadth of  
204 known stem cell heterogeneity in planarians or only a subset of lineages, we  
205 performed FISH for markers of the *sigma* (collectively pluripotent NBs), *zeta*  
206 (NBs committed to the epidermal lineage) and *gamma* (NBs committed to the  
207 gut lineage) cell populations<sup>55</sup>. We found that all three NB populations are  
208 represented in the outgrowths of *LPT*(RNAi) animals (**Figure 5a-c**). *Sigma*,  
209 *zeta* and *gamma* NBs are not significantly increased in pre-outgrowth  
210 *LPT*(RNAi) animals (**Supplementary Figure 4**), suggesting that the presence  
211 of these cells in outgrowths is not a secondary effect of increased cell number  
212 and passive spread of these cell populations, but rather local proliferation at  
213 outgrowth sites.

214 The epidermal progeny, marked by *Prog-1* and *AGAT-1*, were concentrated in  
215 the outgrowths of *LPT*(RNAi) animals, while being in reduced numbers in non-  
216 outgrowth tissue (**Supplementary Figure 5a**). The observed disarray of *Prog-*  
217 *1*<sup>+</sup> and *AGAT-1*<sup>+</sup> cells in outgrowths could be the result of perturbed patterning  
218 and polarity of the epidermal layer in *LPT*(RNAi) animals (**Supplementary**  
219 **Figure 5b**), as epidermal cells appear to have lost polarity and to be no longer  
220 capable of forming a smooth epidermal layer. Furthermore, the average  
221 epidermal nuclear size is significantly increased in *LPT*(RNAi) animals  
222 compared to controls (**Supplementary Figure 5c**), an effect similar to the  
223 pathology seen following knockdown of the tumour suppressor *SMG-1*<sup>54</sup>. The  
224 epithelial layer in *LPT*(RNAi) animals also appears less well-defined than that  
225 in control animals, with a blurred distinction between epithelium and  
226 mesenchyme. Another feature of the *LPT*(RNAi) phenotype, encountered in a  
227 variety of malignancies<sup>56</sup>, are changes in nuclear shape (**Supplementary**  
228 **Figure 5d**).

229 In summary, LPT controls NB proliferation and restricts stem cells to pre-  
230 defined tissue compartments as well as being responsible for the successful  
231 differentiation of several lineages. Taken together, our data demonstrate that  
232 disturbance of the function of planarian LPT leads to development of both



233 differentiation and proliferation defects (**Figure 6**), allowing us to conclude  
234 that the function of LPT/trr/Mll3/4 proteins as an epigenetic tumour suppressor  
235 function is conserved over a large evolutionary distance.

236

### 237 **LPT(RNAi) results in transcriptional changes consistent with driving** 238 **proliferation in stem cells**

239 A key insight missing from the literature for *Mll3* and *Mll4* mutations, is the  
240 downstream targets that are mis-regulated in disease states, for example in  
241 hematopoietic stem cells that cause leukaemia<sup>26</sup>. Given the conserved tumour  
242 suppressor function in planarians, we decided to focus on early regeneration  
243 when *LPT*(RNAi) animals that do not yet exhibit any outgrowth phenotype,  
244 providing the possibility to describe early regulatory changes that are  
245 potentially causal of out growths, rather than consequential. We performed  
246 RNA-seq on X1 (G2/M) fluorescence activated cell sorted (FACS) NBs from  
247 *LPT*(RNAi) and *GFP*(RNAi) planarians at 3 days of regeneration. Our analysis  
248 revealed that 540 transcripts are down-regulated (fold change  $\leq -1.5$ ,  
249  $p < 0.05$ ) and 542 –up-regulated (fold change  $\geq 1.5$ ,  $p < 0.05$ ) in X1 stem cells  
250 from *LPT*(RNAi) animals when compared to controls (**Supplementary Table**  
251 **1**).

252 A recent meta-analysis of all available *S. mediterranea* RNA-seq data allowed  
253 classification of all expressed loci in the planarian genome by their relative  
254 expression in FACS sorted cell populations representing stem cells, stem cell  
255 progeny and differentiated cells<sup>9</sup>. Superimposing the differentially expressed  
256 genes following *LPT*(RNAi) onto a gene expression spectrum reflecting FACS  
257 compartments, shows that *LPT*(RNAi) has a broad effect on gene expression  
258 in X1 cells (**Figure 7a**), affecting genes normally expressed in different  
259 planarian cell types (**Figure 7b**).

260 Analysis of Gene Ontology (GO) terms revealed a clear enrichment for cell  
261 cycle and cell division-associated terms in the list of up-regulated genes  
262 (**Figure 7c**), in agreement with the observed hyper-proliferation in *LPT*(RNAi)  
263 phenotype. The list of down-regulated genes is also enriched for cell cycle-  
264 related terms, as well as cell differentiation and metabolism-related processes

265 **(Figure 7c)**. These findings suggest a broad link between gene expression  
266 changes caused by LPT loss of function and NB over-proliferation.

267

268 **LPT(RNAi)-induced changes to promoter H3K4 methylation and**  
269 **transcription are correlated**

270 Previous studies tie MLL3/4/LPT-Trr function directly to mono- and tri-  
271 methylation of H3K4<sup>29,31-34</sup> and indirectly to tri-methylation of H3K27, because  
272 the H3K27me3 demethylase UTX is present in the same protein complex<sup>57</sup>.  
273 We set out to understand potential epigenetic causes of the transcriptional  
274 changes following *LPT*(RNAi) in planarians. To this end, we performed  
275 Chromatin Immunoprecipitation sequencing (ChIP-seq) on isolated planarian  
276 G2/M stem cells and used *Drosophila* S2 cells as a spike-in control to  
277 normalize for any technical differences between samples<sup>58</sup>. The profile of  
278 H3K4me3, H3K4me1 and H3K27me3 at the transcriptional start sites (TSSs)  
279 of genes in control X1 cells was in agreement with their conserved roles in  
280 transcriptional control<sup>9,34</sup> **(Figure 8a, Supplementary Figure 6)**, suggesting  
281 our methodology was robust. *LPT*(RNAi) led to only subtle changes in the  
282 overall level of H3K4me3 and H3K4me1 at TSSs throughout the genome. A  
283 decrease in H3K4me1 and H3K4me3 was apparent proximal to the TSS in  
284 genes where expression is normally enriched in differentiated cells **(Figure**  
285 **8a)**. Concomitant with this, we also observed an increase in H3K4me1 signal  
286 downstream of the predicted TSS for genes enriched in stem cells **(Figure**  
287 **8a)**. For the H3K27me3 mark, no consistent pattern was observed as a result  
288 of *LPT*(RNAi) in any group of genes subdivided by expression profiles **(Figure**  
289 **8a)**.

290 We next looked specifically at the promoter histone methylation status of  
291 those genes whose transcript levels were affected by *LPT*(RNAi). For genes  
292 with enriched expression in NBs, we observed a significant inverse correlation  
293 between expression following *LPT*(RNAi) and the amount of TSS-proximal  
294 H3K4me1 **(Figure 8b)**. This indicates that *LPT*(RNAi) leads to a reduction of  
295 this repressive mark at some loci and an up-regulation of the cognate  
296 transcript expression in stem cells, consistent with the role of H3K4me1 as a

297 repressive mark. For mis-regulated genes not normally enriched in X1 NBs,  
298 we observed instead a positive correlation between changes in transcriptional  
299 expression (upregulation) and changes in H3K4me3 levels at the TSS and  
300 gene bodies (**Figure 8b**).

301 Overall, our data suggest that reductions in H3K4me1 following *LPT*(RNAi)  
302 cause up-regulation of some of the stem cell genes implicated by RNA-seq  
303 data from *LPT*(RNAi) animals. Our data are consistent with MLL3/4's known  
304 role in H3K4 methylation and identify gene expression profiles following  
305 *LPT*(RNAi) that are broadly correlated with the amount of H3K4me1 and  
306 H3K4me3 at gene promoters.

307

### 308 ***LPT*(RNAi) leads to up-regulation of known and putative oncogenes and** 309 **down-regulation of tumour suppressors**

310 After observing the global changes in expression and histone modification  
311 patterns following *LPT*(RNAi), we wanted to investigate individually mis-  
312 regulated genes that could be major contributors to the differentiation and  
313 outgrowth phenotypes (**Figure 9 and 10**). Within our list of up- and down-  
314 regulated genes, we saw mis-regulation of tumour suppressors, oncogenes  
315 and developmental genes (**Supplementary Table 1**). Detailed inspection of  
316 changes in promoter patterns of H3K4 methylation revealed example loci  
317 where changes in methylation status were both consistent and inconsistent  
318 with changes in transcript levels (**Figure 9a,10a, Supplementary Figure 7a,**  
319 **9a**). For example, we find that the up-regulated expression of the planarian  
320 orthologs of the transcription factors *Elf5* and *pituitary homeobox (pitx)* is  
321 associated with increased levels of TSS-proximal H3K4me3 signal following  
322 *LPT*(RNAi) (**Figure 9a**). Furthermore, up-regulation of some X1-enriched  
323 genes, such as *pim-2-like*, is associated with a decrease in H3K4me1 signal  
324 on the TSS, consistent with alleviated repression (**Figure 9a**). On the other  
325 hand, some transcriptional changes following *LPT*(RNAi), such as the down-  
326 regulation of *Ras-responsive element-binding protein 1 (RREBP1)*, are not  
327 correlated with the expected alterations in histone modification patterns on  
328 promoters (**Figure 10a**). Such examples could potentially represent

329 secondary (not related to histone modifications) or enhancer-dependent  
330 changes in the *LPT*(RNAi) phenotype. In the absence of similar RNA-  
331 seq/ChIP-seq data in mammals, our data provide an important insight beyond  
332 the deep evolutionary conservation of MLL3/4 function.

333 While mis-regulation of well-known oncogenes and tumour suppressors, like  
334 *p53* (**Figure 10a**), would be expected to broadly correlate with mis-regulation  
335 of *Mll3/4* in cancer gene expression datasets, shared correlative expression  
336 changes for some selected genes not previously associated with *Mll3/4* loss  
337 of function provide some independent evidence of a conserved regulatory  
338 program. In the Pomeroy Brain Oncomine dataset<sup>59</sup>, *Mll3* and *p53* expression  
339 levels were both significantly down-regulated (**Supplementary Figure 10**),  
340 supporting the functional link between the two genes established by previous  
341 work<sup>32</sup> and emerging in our study. We identified more *LPT*(RNAi) mis-  
342 regulated genes, which have some known association with growth and/or  
343 cancer, but have not been previously implicated in *Mll3/4* loss of function  
344 phenotypes. A surveillance of the Brune<sup>60</sup> and Compagno<sup>61</sup> lymphoma  
345 Oncomine datasets demonstrates that these genes are mis-regulated in  
346 different cancers in a similar manner to the mis-regulation we observe in  
347 planarians stem cells as a consequence of a decreased *LPT* expression  
348 (**Supplementary Figure 10**).

349 One gene of interest in this data set was the planarian *pitx* gene ortholog. In  
350 planarians, *pitx* is expressed in the serotonergic neuronal precursor cells<sup>62,63</sup>  
351 and is required for their differentiation. Thus, *pitx* is not directly implicated in  
352 planarian stem cell proliferation, but rather in differentiation. Nonetheless,  
353 *pitx*'s up-regulation was of great interest to us since in human  
354 medulloblastomas down-regulation of *Mll3* and over-expression of *pitx2* are  
355 co-occurrences (Pomeroy Brain Oncomine dataset<sup>59</sup> ([www.oncomine.org](http://www.oncomine.org)))  
356 (**Figure 9b**). To investigate the cellular basis for *pitx* overexpression, we  
357 performed FISH for this gene in *LPT*(RNAi) animals. We observed an  
358 accumulation of *pitx*-positive cells in *LPT*(RNAi) regenerates (**Figure 9c**).  
359 Given that production of terminally differentiated serotonergic neurons is  
360 decreased (**Figure 3d**), the increase of *pitx*-positive cells following *LPT*(RNAi)  
361 marks the accumulation of serotonergic neuronal precursors that fail to

362 differentiate. We conclude that planarian LPT normally regulates pitx-  
363 mediated differentiation of serotonergic neurons and that regulation of *pitx* is a  
364 possible example of a conserved feature of MLL3/4 function that is mis-  
365 regulated in some cancer types<sup>59</sup>.

366

### 367 **Double RNAi experiments allow proof of principle functional validation** 368 **of overexpressed LPT target genes**

369 In the planarian model, up-regulated genes in our data set provided the  
370 opportunity to identify genes whose overexpression contributes to the  
371 *LPT/MLL3/4* loss of function phenotype using double RNAi experiments. In  
372 addition to the transcription factor *E74-like factor 5 (Elf5)*, we observed up-  
373 regulation of planarian orthologs of other developmental or cancer associated  
374 genes. Among them were orthologs of the serine/threonine kinase oncogene  
375 *pim-2* (two genes called *Smed-pim-2* and *Smed-pim-2-like*), a paralog of the  
376 epigenetic regulator *Suppressor of zeste (Su(z)12)*, the transcription factors  
377 *ETS4* and *FoxA1* and an ULK2-like serine/threonine protein kinase (**Figure**  
378 **9a, Supplementary Figure 7a**). Our ChIP-seq data suggested *pim-2*, *ETS4*  
379 *and ULK2-like* are either indirectly regulated or regulated by LPT at  
380 enhancers, while *pim-2-like*, *FoxA1*, *Su(z)12 paralog* and *Elf5* appear to be a  
381 direct target of LPT as their increased expression was associated with either  
382 reduced H3K4me1 or increased H3K4me3 signal at promoters (**Figure 9a,**  
383 **Supplementary Figure 7a**).

384 We decided to focus on these genes because they all have a known role in a  
385 wide range of cancers. Overexpression of the cell fate decisions determinant  
386 *Elf5* is a known driving force behind breast cancer progression and  
387 metastasis<sup>64</sup>. The PIM family of proteins is involved in the integration of  
388 growth and survival signals<sup>65</sup> and their overexpression has been associated  
389 with hematological malignancies and solid tumours<sup>66</sup>. Inhibition of PIM2 is a  
390 promising avenue for the treatment of multiple myeloma<sup>65</sup>. *Su(z)12* is part of  
391 the ubiquitous polycomb repressive complex 2 (PRC2) and is overexpressed  
392 in numerous cancers, including gastric cancer where *Su(z)12* levels were  
393 associated with increased metastasis and unfavorable survival prognosis<sup>67</sup>.

394 The ETS family of transcription factors has demonstrated significant  
395 involvement in all stages of tumorigenesis<sup>68</sup>, while FoxA1 is known as ‘pioneer  
396 transcription factor in organogenesis and cancer progression’<sup>69</sup>. Finally, ULK2  
397 is an autophagy regulator overexpressed in prostate cancer cells<sup>70</sup>. This  
398 selected panel of genes represents some of the best candidates for major  
399 effects amongst those genes with significant up-regulation in expression  
400 following *LPT*(RNAi).

401 In order to test whether the up-regulated expression of any of these genes is  
402 a potentially significant contributor to the *LPT*(RNAi) outgrowth phenotype, we  
403 performed *LPT*(RNAi) rescue experiments in the form of double RNAi  
404 knockdowns (**Figure 9d-f, Supplementary Figure 7**). At 48 hours post-  
405 amputation, *LPT*(RNAi) regenerates have a significantly increased NB  
406 proliferation (**Figure 4a, b**) and so do *GFP/LPT*(RNAi) double knockdown  
407 animals (**Figure 9d,e**). Whereas *pim-2/LPT*(RNAi), *ETS4/LPT*(RNAi),  
408 *FoxA1/LPT*(RNAi), *ULK2-like/LPT*(RNAi) and *Su(z)12 paralogue/LPT*(RNAi)  
409 regenerates still have elevated NB proliferation, both *pim-2-like/LPT*(RNAi)  
410 and *Elf5/LPT*(RNAi) regenerates have a significantly decreased NB  
411 proliferation compared to *GFP/LPT*(RNAi) (**Figure 9d,e and Supplementary**  
412 **Figure 7b**). Furthermore, not only did *pim-2-like/LPT*(RNAi) and  
413 *Elf5/LPT*(RNAi) regenerating animals show improved blastema formation  
414 (**Supplementary Figure 7c**), but also less than half as many animals in these  
415 two conditions went on to form outgrowths compared to *GFP/LPT*(RNAi)  
416 (**Figure 9f**), demonstrating a rescue of the outgrowth phenotype. Importantly,  
417 individual knockdown of *Elf5* and *pim-2-like* did not lead to regenerative,  
418 proliferation or outgrowth-related defects (**Supplementary Figure 8**). These  
419 findings suggest that the up-regulation of both *pim-2-like* and *Elf5* is  
420 specifically involved in driving the *LPT*(RNAi) outgrowth phenotype and  
421 demonstrate the utility of our data for validating the role of MLL3/4 targets.

422

423 ***LPT*(RNAi)’s differentiation defects can be explained by down-regulated**  
424 **transcription factors**

425 We chose a selection of transcription factors down regulated by *LPT(RNAi)*  
426 for further investigation to see if they might contribute to the observed  
427 *LPT(RNAi)* phenotype. *LPT(RNAi)* leads to the down-regulation of the tumour  
428 suppressor *p53*, *PRDM1-1* and *cut-like1* in X1 stem cells (**Figure 10a**). These  
429 genes' down-regulation is associated with a decrease in H3K4me3 levels on  
430 their promoters. On the other hand, *RREBP1*'s down-regulation, does not  
431 correlate with the amount of H3K4me3 on its promoter. While the function of  
432 *p53* in planarians has already been described<sup>71</sup>, the role of *PRDM1-1*, *cut-*  
433 *like1* and *RREBP1* remain unexplored in planarian biology. Knockdown of  
434 each of these three genes resulted in impaired regeneration, characterized  
435 mainly by the inability to form eyes (**Figure 10b**). *RREBP1(RNAi)* resulted in  
436 significantly increased proliferation compared to control, while *cut-like1(RNAi)*  
437 and *PRDM1-1(RNAi)* animals did not show a significant change in mitotic cell  
438 numbers (**Figure 10c**). All three knockdown conditions showed a decreased  
439 number of *prog-1*-positive epidermal progenitors, but intact *smedwi-1*-positive  
440 cell numbers (**Figure 10d**). These findings suggest that the observed  
441 differentiation phenotypes are not associated with an inability to maintain the  
442 stem cell pool following knockdown. Instead, stem cells seem to be restricted  
443 in their ability to differentiate correctly.

444 Our data suggest that decreased expression of *PRDM1-1*, *cut-like1* and  
445 *RREBP1* in *LPT(RNAi)* animals could be contributing to the differentiation  
446 defects seen after perturbation of *LPT/Trr/MLL3/4* function, and that  
447 downregulation *RREBP1* may be contributing to the early over proliferation of  
448 stem cells observed in *LPT(RNAi)*.

449

## 450 Discussion

451 In mammals, *Mll3* and *Mll4* have been implicated in different malignancy  
452 landscapes<sup>24</sup>, with clear evidence for tumour suppressor roles in mammalian  
453 systems<sup>26,32,72</sup>. However, relatively little is known about how these effects are  
454 mediated. Our study demonstrates that loss of function of the planarian *LPT*  
455 (an *Mll3/4* ortholog) also results in the emergence of an outgrowth phenotype  
456 characterized by differentiation and proliferation defects. Our work also shows

457 that LPT, TRR-1 and TRR-2 control differentiation to form the gut, eyes, brain,  
458 and pharyngeal cellular lineages, Future work in planarians combining ChIP-  
459 seq and RNA-seq will allow closer investigation of these and other epigenetic  
460 effects on stem cell differentiation.

461 We found that clusters of mitotic cells preceded the appearance of outgrowths  
462 in *LPT*(RNAi) regenerating animals, possibly pre-empting where the  
463 outgrowths would subsequently form. The observation of clusters of cells and  
464 the formation of outgrowths in some, but not all, RNAi animals is evidence of  
465 heterogeneity in stem cell responses to *LPT*(RNAi). This may reflect the  
466 stochastic nature of the broad genome wide epigenetic changes mediated by  
467 MLL3/4 proteins that will lead to variability between cells after knockdown,  
468 such that only some NBs cycle out of control and cause outgrowths after the  
469 initial proliferative peaks associated with regeneration. A contributory cause to  
470 outgrowth formation in addition to proliferation could be failure of NBs to  
471 differentiate appropriately and instead continue to cycle at inappropriate  
472 positions. We also observed that outgrowth tissue contained different classes  
473 of stem cells. Among these stem cells, the presence of *sigma* NBs, thought to  
474 include truly pluripotent stem cells<sup>55</sup>, is of particular significance. When mis-  
475 regulated, these cells could share fundamental similarities with cancer stem  
476 cells (CSCs), thought to be founder cells in human malignancies<sup>73</sup>. CSCs  
477 have been described as one of the main factors in cancer aggressiveness and  
478 resistance to treatment<sup>74</sup>. Studying such cells in a simple *in vivo* stem cell  
479 model, provided by the planarian system, should bring further insight into  
480 important control mechanisms that are mis-regulated in different cancers. Our  
481 work here provides a useful example of this approach.

482 Our data suggest that LPT regulates expression of genes across cell types,  
483 including some genes with enriched expression in stem cells. Genes with  
484 significant expression differences following *LPT*(RNAi) were mostly  
485 associated with cell proliferation, differentiation and metabolic processes. A  
486 subset of mis-regulated genes where RNA-seq and ChIP-seq data correlate is  
487 likely a direct consequence of *LPT*(RNAi) affecting promoter histone  
488 methylation status. Genes with altered expression where there is no such  
489 correlation, may represent indirect (secondary) changes or, alternatively, may



490 have enhancers that have altered histone modifications as a result of  
491 *LPT*(RNAi). Future work will develop the use of planarians as a model of  
492 epigenetic gene regulation and it should also be possible to study enhancer  
493 function and evolution.

494 Amongst mis-regulated genes, we saw many tumour suppressors with  
495 reduced expression and oncogenes with increased expression. We also found  
496 a number of genes, including the transcription factor *pitx*, which were similarly  
497 mis-regulated in *LPT*(RNAi) planarians and human cancers with reduced *MLL3*  
498 expression. Together, these data suggest that, as well as physiological  
499 function in controlling stem cell proliferation, there may be deep regulatory  
500 conservation of MLL3/4 function in animal stem cells. One advantage of our  
501 approach is that we were able to sample expression and histone states in  
502 NBs at an early time point before tumours formed. This could be an  
503 advantage for the identifying targets that act early to drive hyperplasia, rather  
504 than later secondary regulatory changes.

505 As proof of principle that genes mis-regulated by *LPT*(RNAi) directly  
506 contributed to the phenotype, we performed double RNAi experiments.  
507 Planarian homologs of the oncogene *pim-2*, called *Smed-pim-2* and *Smed-*  
508 *pim-2-like*, that were overexpressed in stem cells following *LPT*(RNAi), were  
509 chosen as likely candidates, based on previous data on the roles of these  
510 genes from mammals<sup>66-70</sup>. We found that double RNAi with *pim-2-like*, was  
511 able to ameliorate *LPT* loss of function over-proliferation and outgrowth  
512 phenotypes induced by *LPT*(RNAi). In addition, double knockdown with the  
513 breast cancer oncogene *Elf5*<sup>64</sup> resulted in an even more dramatic rescue of  
514 the *LPT* loss of function phenotype. This provides strong support for the  
515 hypothesis that the over-expression of these two genes was significant in  
516 driving stem cell hyperplasia. Future work can now study how these genes  
517 function in stem cells and why overexpression leads to overproliferation.

518 We also identified downstream candidates that could be contributing to the  
519 lack of differentiation phenotype following *LPT*(RNAi). Knockdown of *PRDM1-*  
520 *1*, *cut-like* and *RREBP-1* (down-regulated in *LPT*(RNAi) animals) indicated  
521 their mis-regulation might contribute to the decreased epidermal differentiation  
522 observed following *LPT* knockdown.

523 Together these experiments, demonstrate the value of our approach to  
524 identify potential downstream targets and implicate novel regulatory  
525 interactions driving the *Mll3/4* loss of function phenotype. These targets can  
526 now be tested for conservation in mammalian experimental systems.

527 Overall, our work shows how perturbation of a conserved physiological role of  
528 LPT leads to mis-regulation of genes well-known to control cell proliferation,  
529 causing hyperplasia and tumours in planarians. We find other genes that are  
530 mis-regulated in planarians that are also similarly mis-regulated in cancer  
531 expression studies that have reduced *Mll3* expression. Some of these, like  
532 *pitx*, may represent deeply conserved regulatory interactions. In the absence  
533 of similar RNA-seq/ChIP-seq data in mammals, our data provide an important  
534 insight into *Mll3/4* loss of function, as well as revealing a deep evolutionary  
535 conservation in animal stem cells. These findings demonstrate the strength of  
536 the planarian system for understanding fundamental animal stem cell biology  
537 and the potential for investigation of epigenetic mechanisms in stem cells.

538

## 539 **Methods**

### 540 *Animal husbandry*

541 Asexual freshwater planarians of the species *S. mediterranea* were used. The  
542 culture was maintained in 1x Montjuic salts water<sup>75</sup>. Planarians were fed  
543 organic calf liver once a week. After every feeding, the water was changed.  
544 Planarians were starved for 7 days prior to each experiment. They were also  
545 starved throughout the duration of each experiment.

546

### 547 *RNAi*

548 Double-stranded RNA (dsRNA) was synthesized from DNA fragments cloned  
549 in pCRII (Invitrogen) or pGEM-T Easy (Promega) vectors. T7 (Roche) and  
550 SP6 (NEB) RNA polymerases were used for transcription of each strand. The  
551 two transcription reactions were combined upon ethanol precipitation. RNA  
552 was denatured at 68 °C and re-annealed at 37 °C. Quantification was  
553 performed on a 1% agarose gel and Nanodrop spectrophotometer.

554 For single RNAi experiments a working concentration of 2 µg/µl was used. For  
555 double RNAi, each gene's RNA was at a concentration 4 µg/µl, resulting in  
556 solution concentration of 2 µg/µl.

557 DsRNA was delivered via microinjection using Nanoject II apparatus  
558 (Drummond Scientific) with 3.5" Drummond Scientific (Harvard Apparatus)  
559 glass capillaries pulled into fine needles on a Flaming/Brown Micropipette  
560 Puller (Patterson Scientific). Each animal received around 100 nl dsRNA each  
561 day. *H2B*(RNAi) was performed for three consecutive days, as per Solana et  
562 al.'s (2012) protocol<sup>7</sup>. For single and double *LPT*, *trr-1* and *trr-2* knockdown, a  
563 course of 7 days of microinjections was performed (3 consecutive days + 2  
564 days rest + 4 consecutive days). *Set1*(RNAi) and *utx*(RNAi) were performed  
565 for 4 consecutive days. For all other single and double knockdowns, a course  
566 of 10 days of microinjections was performed (3 consecutive days + 4 days  
567 rest + 3 consecutive days).

568 Primers used for amplification of DNA for dsRNA synthesis can be found in  
569 **Supplementary Table 2.**

570

#### 571 *In situ hybridization*

572 RNA probes labeled with digoxigenin and fluorescein were generated via anti-  
573 sense transcription of DNA cloned in PCRII (Invitrogen) or PGemTEasy  
574 (Promega) vector. *In situ* hybridization was performed as described in King  
575 and Newmark's protocol<sup>76</sup> for most fluorescent experiments. For *LPT*, *trr-1*,  
576 *trr-2*, *sigma*, *zeta* and *gamma* fluorescent *in situ* procedures, a pooled probes  
577 method was used, as described in van Wolfswinkel et al.<sup>55</sup>. Colorimetric *in situ*  
578 hybridization procedures were performed as described in Gonzalez-Esteviz  
579 et al.<sup>77</sup>. Primers used for amplification of DNA for RNA probe synthesis can be  
580 found in (**Supplementary Table 2**).

581

#### 582 *Immunohistochemistry*

583 Immunohistochemistry was performed as described in Cebria and Newmark<sup>78</sup>.  
584 Antibodies used were: anti-H3P (phosphorylated serine 10 on histone H3;

585 Millipore; 09-797; 1:1000 dilution), anti-VC1 (kindly provided by Prof. Hidefumi  
586 Orii (check title); 1:10000 dilution), anti-SMEDWI-1 (kindly provided by Prof.  
587 Jochen Rink; 1:500 dilution), anti-SYNORF-1 (3C11; Developmental Studies  
588 Hybridoma Bank; 1:50 dilution), anti-acetylated tubulin (Developmental  
589 Studies Hybridoma Bank; 1:200 dilution).

590

#### 591 *Imaging and image analysis*

592 Colorimetric images were taken on Zeiss Discovery V8 (Carl Zeiss)  
593 microscope with a Canon EOS 600D or Canon EOS 1200D camera.  
594 Fluorescent images were taken on either Inverted Olympus FV1000 or  
595 FV1200 Confocal microscope. Cells were counted via Adobe Photoshop CS6  
596 or FIJI software and the count was normalized to image area in mm<sup>2</sup>.

597

#### 598 *Flow cytometry*

599 A modified version of Romero et al.'s<sup>79</sup> planarian FACS protocol was used, as  
600 described in Kao et al.<sup>9</sup>. A FACS Aria III machine equipped with a violet laser  
601 was used for the sort. BD FACSDiva and FlowJo software was used for  
602 analysis and gate-setting.

603

#### 604 *Western blot*

605 2xLaemmli buffer (Sigma Aldrich), 1M DTT and cOmplete protease inhibitors  
606 (Roche) were used for protein extraction from 10-15 animals per condition.  
607 Protein extract was quantified with Qubit Protein Assay kit (Thermo Fisher  
608 Scientific). NuPAGE Novex 4-12% Bis-Tris protein gels (Thermo Fisher  
609 Scientific) were used, followed by a wet transfer in a Mini Trans-Blot  
610 Electrophoretic Transfer Cell machine. Ponceau S (Sigma Aldrich) whole-  
611 protein stain was used prior to antibody incubation. The antibodies used were:  
612 anti-H3 (unmodified histone H3; rabbit polyclonal; Abcam; ab1791; 1:10000  
613 dilution), anti-H3K4me3 (rabbit polyclonal; Abcam; ab8580; 1:1000 dilution),  
614 anti-H3K4me1 (rabbit polyclonal; Abcam; ab8895; 1:1000 dilution), anti-  
615 H3K27me3 (mouse monoclonal; Abcam; ab6002; 1:1000 dilution), anti-mouse

616 IgG HRP-linked antibody (Cell Signalling; 7076P2), anti-rabbit IgG HRP-linked  
617 antibody (Cell Signalling; 7074P2). Western blot experiments were done to  
618 validate the specificity of the histone modification antibodies used for ChIP-  
619 seq (**Supplementary Figure 11**). The rationale behind these experiments  
620 was to knock down a methylase (*set1*), part of a methylase complex (*LPT*) or  
621 a demethylase (*utx*) known to affect H3K4 and H3K27 methylation levels and  
622 to observe whether global H3K4me1, H3K4me3 and H3K27me3 levels would  
623 change in the expected way.

624

#### 625 *ChIP-seq*

626 600,000-700,000 planarian x1 cells were FACS-sorted (using 3-day  
627 knockdown regenerates) in PBS and pelleted at 4 °C. During the pelleting, S2  
628 cells were added (corresponding to roughly 15% of the number of planarian  
629 x1 cells) for the purpose of downstream data normalisation<sup>58</sup>. Samples were  
630 then processed as described in Kao et al. (2017)<sup>9</sup>. The process is  
631 summarized in **Supplementary Figure 12**. The libraries were sequenced on  
632 an Illumina NextSeq machine. Three biological replicates were prepared. The  
633 raw reads are available in the Short Read Archive (PRJNA338116).

634

#### 635 *RNA-seq*

636 300,000 x1 NBs were FACS-sorted in RNALater (Ambion) from knockdown  
637 animals at 3 days of regeneration. Cells were pelleted at 4 °C and Trizol-  
638 based total RNA extraction was performed. The amount of total RNA used for  
639 each library preparation was 0.8-1 µg. Illumina TruSeq Stranded mRNA LT kit  
640 was used for library preparation. The kit instructions were followed. Libraries  
641 were quantified with Qubit, Agilent Bioanalyzer and KAPA Library  
642 Quantification qPCR kit. Samples were sequenced on an Illumina NextSeq  
643 machine. Two biological replicates were prepared. The raw reads are  
644 available in the Short Read Archive (PRJNA338115).

645

#### 646 *ChIP-seq data analysis*

647 ChIP-seq reads were trimmed with Trimmomatic 0.32<sup>80</sup> and aligned to the *S.*  
648 *mediterranea* SmedGD asexual genome 1.1<sup>81</sup> and *D. melanogaster* genome  
649 r6.10<sup>82</sup> with BWA mem 0.7.12. Picard tools 1.115 was used to remove read  
650 duplicates after mapping. Python scripts were used to filter and separate out  
651 read pairs belonging to either genome. ChIP-seq coverage tracks were then  
652 generated and normalized according to *Orlando et al.* in order to account for  
653 any technical variation between samples<sup>58</sup>. For more in-depth methods,  
654 including code, refer to **Supplementary Note 1**.

655

#### 656 *RNA-seq data analysis*

657 Raw reads were trimmed with Trimmomatic 0.32<sup>80</sup> and pseudo-aligned to a  
658 set of asexual genome annotations described in Kao et al. (2017) with Kallisto  
659 0.42<sup>83</sup>. Differential expression was subsequently performed with Sleuth  
660 0.28.1<sup>84</sup>. For more in-depth methods, including code, refer to **Supplementary**  
661 **Note 1**.

662

#### 663 *Statistical methods*

664 Wherever cell number was compared between experimental condition and  
665 control, a 2-tailed t-test assuming unequal variance was used. Each legend  
666 states the number of specimens per condition, where relevant. Bar graphs  
667 show the mean average and the error bars are always Standard Error of the  
668 Mean.

669 For analysis of RNA-seq data, Wald's test (as part of the Sleuth<sup>85</sup> software)  
670 was used for assessing differential expression. Spearman's rank correlation  
671 was used for assessing the correlation between RNA-seq and ChIP-seq data.  
672 Hypergeometric tests were used for assessing gene enrichment in the RNA-  
673 seq data.

674

#### 675 *Data availability*

676 The ChIP-seq and RNA-seq datasets are deposited in the Short Read Archive  
677 with accession numbers: PRJNA338116 and PRJNA338115 respectively).

678 The ‘Pomeroy Brain’ dataset<sup>59</sup> from the oncomine database  
679 (<https://www.oncomine.com>) was used for assessing expression level of *pitx2*  
680 and *Mll3* in human medulloblastoma versus normal cerebellum. All other data  
681 availability is either within the article (and its supplementary information).

682

## 683 **Declarations**

### 684 *Competing interests*

685 The authors declare they have no competing interests.

### 686 *Funding*

687 This work was funded by grants from the Medical Research Council (grant  
688 number MR/M000133/1) and the Biotechnology and Biological Sciences  
689 Research Council (grant number BB/K007564/1) to A.A.A.

690

### 691 *Authors’ contributions*

692 AAA, PA and YM conceived and designed the study. YM and PA performed  
693 the experiments. DK performed the bioinformatics analyses. SH participated  
694 in the optimization of the ChIP-seq protocol. AGL provided technical support.  
695 FJH performed initial work on the project, including generating the first  
696 *LPT*(RNAi) results. NK helped with sigma, zeta and gamma *in situ*  
697 hybridization experiments. YM, PA and AAA wrote the manuscript.

698

### 699 *Acknowledgements*

700 We thank past and present members of the AA lab for comments on the  
701 manuscript.

702

703

## 704 **References**

- 705 1. Aboobaker, A. A. Planarian stem cells: a simple paradigm for  
706 regeneration. *Trends in Cell Biology* **21**, 304–311 (2011).
- 707 2. Rink, J. C. Stem cell systems and regeneration in planaria. *Dev Genes*

- 708 *Evol* **223**, 67–84 (2012).
- 709 3. Onal, P. *et al.* Gene expression of pluripotency determinants is  
710 conserved between mammalian and planarian stem cells. *The EMBO*  
711 *Journal* **31**, 2755–2769 (2012).
- 712 4. Adamidi, C. *et al.* De novo assembly and validation of planaria  
713 transcriptome by massive parallel sequencing and shotgun proteomics.  
714 *Genome Research* **21**, 1193–1200 (2011).
- 715 5. Labbé, R. M. *et al.* A Comparative Transcriptomic Analysis Reveals  
716 Conserved Features of Stem Cell Pluripotency in Planarians and  
717 Mammals. *STEM CELLS* **30**, 1734–1745 (2012).
- 718 6. Solana, J. *et al.* Conserved functional antagonism of CELF and MBNL  
719 proteins controls stem cell-specific alternative splicing in planarians.  
720 *eLife* **5**, 1193 (2016).
- 721 7. Solana, J. *et al.* Defining the molecular profile of planarian pluripotent  
722 stem cells using a combinatorial RNA-seq, RNA interference and  
723 irradiation approach. *Genome Biol.* **13**, R19 (2012).
- 724 8. Alié, A. *et al.* The ancestral gene repertoire of animal stem cells. *Proc*  
725 *Natl Acad Sci USA* 201514789–8 (2015).  
726 doi:10.1073/pnas.1514789112
- 727 9. Kao, D., Mihaylova, Y., Hughes, S., Lai, A. & Aboobaker, A. Epigenetic  
728 analyses of the planarian genome reveals conservation of bivalent  
729 promoters in animal stem cells. *bioRxiv* 122135 (2017).  
730 doi:10.1101/122135
- 731 10. Shibata, N. *et al.* Inheritance of a Nuclear PIWI from Pluripotent Stem  
732 Cells by Somatic Descendants Ensures Differentiation by Silencing  
733 Transposons in Planarian. *Developmental Cell* **37**, 226–237 (2016).
- 734 11. Salvetti, A. DjPum, a homologue of Drosophila Pumilio, is essential to  
735 planarian stem cell maintenance. *Development* **132**, 1863–1874 (2005).
- 736 12. Reddien, P. W. Specialized progenitors and regeneration. *Development*  
737 **140**, 951–957 (2013).
- 738 13. Juliano, C. E., Swartz, S. Z. & Wessel, G. M. A conserved germline  
739 multipotency program. *Development* **137**, 4113–4126 (2010).
- 740 14. Jaber-Hijazi, F. *et al.* Planarian MBD2/3 is required for adult stem cell  
741 pluripotency independently of DNA methylation. *Developmental Biology*  
742 **384**, 141–153 (2013).
- 743 15. Scimone, M. L., Meisel, J. & Reddien, P. W. The Mi-2-like Smed-CHD4  
744 gene is required for stem cell differentiation in the planarian *Schmidtea*  
745 *mediterranea*. *Development* **137**, 1231–1241 (2010).
- 746 16. Zhu, S. J., Hallows, S. E., Currie, K. W., Xu, C. & Pearson, B. J. A mex3  
747 homolog is required for differentiation during planarian stem cell lineage  
748 development. *eLife* **4**, 304 (2015).
- 749 17. Cowles, M. W., Omuro, K. C., Stanley, B. N., Quintanilla, C. G. & Zayas,  
750 R. M. COE Loss-of-Function Analysis Reveals a Genetic Program  
751 Underlying Maintenance and Regeneration of the Nervous System in  
752 Planarians. *PLoS Genet* **10**, e1004746–12 (2014).
- 753 18. Barberan, S., Fraguas, S. & Cebrià, F. The EGFR signaling pathway  
754 controls gut progenitor differentiation during planarian regeneration and  
755 homeostasis. *Development* **143**, 2089–2102 (2016).
- 756 19. Guedelhofer, O. C. & Alvarado, A. S. Amputation induces stem cell  
757 mobilization to sites of injury during planarian regeneration.



- 758 *Development* **139**, 3510–3520 (2012).
- 759 20. Abnave, P. *et al.* Epithelial-mesenchymal transition transcription factors  
760 control pluripotent adult stem cell migration in vivo in planarians.  
761 *Development* **144**, 3440–3453 (2017).
- 762 21. Varambally, S. *et al.* The polycomb group protein EZH2 is involved in  
763 progression of prostate cancer. *Nature* **419**, 624–629 (2002).
- 764 22. Villa, R. *et al.* Role of the Polycomb Repressive Complex 2 in Acute  
765 Promyelocytic Leukemia. *Cancer Cell* **11**, 513–525 (2007).
- 766 23. Parsons, D. W. *et al.* The genetic landscape of the childhood cancer  
767 medulloblastoma. *Science* **331**, 435–439 (2011).
- 768 24. Kandoth, C. *et al.* Mutational landscape and significance across 12  
769 major cancer types. *Nature* **502**, 333–339 (2013).
- 770 25. Gui, Y. *et al.* Frequent mutations of chromatin remodeling genes in  
771 transitional cell carcinoma of the bladder. *Nature Publishing Group* **43**,  
772 875–878 (2011).
- 773 26. Chen, C. *et al.* MLL3 Is a Haploinsufficient 7q Tumor Suppressor in  
774 Acute Myeloid Leukemia. *Cancer Cell* **25**, 652–665 (2014).
- 775 27. Shilatifard, A. The COMPASS Family of Histone H3K4 Methylases:  
776 Mechanisms of Regulation in Development and Disease Pathogenesis.  
777 *Annu. Rev. Biochem.* **81**, 65–95 (2012).
- 778 28. Wu, M. *et al.* Molecular Regulation of H3K4 Trimethylation by Wdr82, a  
779 Component of Human Set1/COMPASS. *Molecular and Cellular Biology*  
780 **28**, 7337–7344 (2008).
- 781 29. Herz, H. M. *et al.* Enhancer-associated H3K4 monomethylation by  
782 Trithorax-related, the Drosophila homolog of mammalian Mll3/Mll4.  
783 *Genes & Development* **26**, 2604–2620 (2012).
- 784 30. Wang, P. *et al.* Global Analysis of H3K4 Methylation Defines MLL  
785 Family Member Targets and Points to a Role for MLL1-Mediated H3K4  
786 Methylation in the Regulation of Transcriptional Initiation by RNA  
787 Polymerase II. *Molecular and Cellular Biology* **29**, 6074–6085 (2009).
- 788 31. Hu, D. *et al.* The MLL3/MLL4 Branches of the COMPASS Family  
789 Function as Major Histone H3K4 Monomethylases at Enhancers.  
790 *Molecular and Cellular Biology* **33**, 4745–4754 (2013).
- 791 32. Lee, J. *et al.* A tumor suppressive coactivator complex of p53 containing  
792 ASC-2 and histone H3-lysine-4 methyltransferase MLL3 or its paralogue  
793 MLL4. *Proc. Natl. Acad. Sci. U.S.A.* **106**, 8513–8518 (2009).
- 794 33. Sedkov, Y. *et al.* Methylation at lysine 4 of histone H3 in ecdysone-  
795 dependent development of Drosophila. *Nature* **426**, 78–83 (2003).
- 796 34. Cheng, J. *et al.* A Role for H3K4 Monomethylation in Gene Repression  
797 and Partitioning of Chromatin Readers. *Molecular Cell* **53**, 979–992  
798 (2014).
- 799 35. Chauhan, C., Zraly, C. B., Parilla, M., Diaz, M. O. & Dingwall, A. K.  
800 Histone recognition and nuclear receptor co-activator functions of  
801 Drosophila Cara Mitad, a homolog of the N-terminal portion of  
802 mammalian MLL2 and MLL3. *Development* **139**, 1997–2008 (2012).
- 803 36. Hubert, A. *et al.* Epigenetic regulation of planarian stem cells by the  
804 SET1/MLL family of histone methyltransferases. *Epigenetics* **8**, 79–91  
805 (2013).
- 806 37. Duncan, E. M., Chitsazan, A. D., Seidel, C. W. & Alvarado, A. S. Set1  
807 and MLL1/2 Target Distinct Sets of Functionally Different Genomic Loci

- 808 In&nbsp;Vivo. *CellReports* **13**, 2741–2755 (2015).
- 809 38. Lee, J.-E. *et al.* H3K4 mono- and di-methyltransferase MLL4 is required  
810 for enhancer activation during cell differentiation. *eLife* **2**, 2817–25  
811 (2013).
- 812 39. Mohan, M. *et al.* The COMPASS Family of H3K4 Methylases in  
813 *Drosophila*. *Molecular and Cellular Biology* **31**, 4310–4318 (2011).
- 814 40. Wang, C. *et al.* Enhancer priming by H3K4 methyltransferase MLL4  
815 controls cell fate transition. *Proc. Natl. Acad. Sci. U.S.A.* **113**, 11871–  
816 11876 (2016).
- 817 41. Denissov, S. *et al.* Mll2 is required for H3K4 trimethylation on bivalent  
818 promoters in embryonic stem cells, whereas Mll1 is redundant.  
819 *Development* **141**, 526–537 (2014).
- 820 42. Hsieh, J. J.-D., Ernst, P., Erdjument-Bromage, H., Tempst, P. &  
821 Korsmeyer, S. J. Proteolytic cleavage of MLL generates a complex of  
822 N- and C-terminal fragments that confers protein stability and  
823 subnuclear localization. *Molecular and Cellular Biology* **23**, 186–194  
824 (2003).
- 825 43. Chen, W. *et al.* Malignant Transformation Initiated by Mll-AF9: Gene  
826 Dosage and Critical Target Cells. *Cancer Cell* **13**, 432–440 (2008).
- 827 44. Corral, J. *et al.* An Mll-AF9 fusion gene made by homologous  
828 recombination causes acute leukemia in chimeric mice: a method to  
829 create fusion oncogenes. *Cell* **85**, 853–861 (1996).
- 830 45. Thirman, M. J. *et al.* Rearrangement of the MLL gene in acute  
831 lymphoblastic and acute myeloid leukemias with 11q23 chromosomal  
832 translocations. *N. Engl. J. Med.* **329**, 909–914 (1993).
- 833 46. Sobulo, O. M. *et al.* MLL is fused to CBP, a histone acetyltransferase, in  
834 therapy-related acute myeloid leukemia with a t(11;16)(q23;p13.3). *Proc*  
835 *Natl Acad Sci USA* **94**, 8732–8737 (1997).
- 836 47. Goo, Y. H. *et al.* Activating Signal Cointegrator 2 Belongs to a Novel  
837 Steady-State Complex That Contains a Subset of Trithorax Group  
838 Proteins. *Molecular and Cellular Biology* **23**, 140–149 (2003).
- 839 48. Lee, S. *et al.* Coactivator as a target gene specificity determinant for  
840 histone H3 lysine 4 methyltransferases. *Proc Natl Acad Sci USA* **103**,  
841 15392–15397 (2006).
- 842 49. Bienz, M. The PHD finger, a nuclear protein-interaction domain. *Trends*  
843 *in Biochemical Sciences* **31**, 35–40 (2006).
- 844 50. Lee, S., Lee, J., Lee, S.-K. & Lee, J. W. Activating Signal Cointegrator-2  
845 Is an Essential Adaptor to Recruit Histone H3 Lysine 4  
846 Methyltransferases MLL3 and MLL4 to the Liver X Receptors. *Molecular*  
847 *Endocrinology* **22**, 1312–1319 (2008).
- 848 51. Ansari, K. I., Hussain, I., Kasiri, S. & Mandal, S. S. HOXC10 is  
849 overexpressed in breast cancer and transcriptionally regulated by  
850 estrogen via involvement of histone methylases MLL3 and MLL4.  
851 *Journal of Molecular Endocrinology* **48**, 61–75 (2012).
- 852 52. Wenemoser, D. & Reddien, P. W. Planarian regeneration involves  
853 distinct stem cell responses to wounds and tissue absence.  
854 *Developmental Biology* **344**, 979–991 (2010).
- 855 53. Oviedo, N. J., Pearson, B. J., Levin, M. & Sanchez Alvarado, A.  
856 Planarian PTEN homologs regulate stem cells and regeneration through  
857 TOR signaling. *Disease Models and Mechanisms* **1**, 131–143 (2008).

- 858 54. Gonzalez-Estevez, C. *et al.* SMG-1 and mTORC1 Act Antagonistically  
859 to Regulate Response to Injury and Growth in Planarians. *PLoS Genet*  
860 **8**, e1002619–17 (2012).
- 861 55. van Wolfswinkel, J. C., Wagner, D. E. & Reddien, P. W. Single-Cell  
862 Analysis Reveals Functionally Distinct Classes within the Planarian  
863 Stem Cell Compartment. *Stem Cell* **15**, 326–339 (2014).
- 864 56. Zink, D., Fische, A. H. & Nickerson, J. A. Nuclear structure in cancer  
865 cells. *Nat Rev Cancer* **4**, 677–687 (2004).
- 866 57. Lee, M. G. *et al.* Demethylation of H3K27 regulates polycomb  
867 recruitment and H2A ubiquitination. *Science* **318**, 447–450 (2007).
- 868 58. Orlando, D. A. *et al.* Quantitative ChIP-Seq Normalization Reveals  
869 Global Modulation of the Epigenome. *CellReports* **9**, 1163–1170 (2014).
- 870 59. Pomeroy, S. L. *et al.* Prediction of central nervous system embryonal  
871 tumour outcome based on gene expression. *Nature* **415**, 436–442  
872 (2002).
- 873 60. Brune, V. *et al.* Origin and pathogenesis of nodular lymphocyte-  
874 predominant Hodgkin lymphoma as revealed by global gene expression  
875 analysis. *J. Exp. Med.* **205**, 2251–2268 (2008).
- 876 61. Compagno, M. *et al.* Mutations of multiple genes cause deregulation of  
877 NF-kappaB in diffuse large B-cell lymphoma. *Nature* **459**, 717–721  
878 (2009).
- 879 62. Currie, K. W. & Pearson, B. J. Transcription factors *lhx1/5-1* and *pitx* are  
880 required for the maintenance and regeneration of serotonergic neurons  
881 in planarians. *Development* **140**, 3577–3588 (2013).
- 882 63. März, M., Seebeck, F. & Bartscherer, K. A *Pitx* transcription factor  
883 controls the establishment and maintenance of the serotonergic lineage  
884 in planarians. *Development* **140**, 4499–4509 (2013).
- 885 64. Gallego-Ortega, D. *et al.* ELF5 Drives Lung Metastasis in Luminal  
886 Breast Cancer through Recruitment of Gr1+ CD11b+ Myeloid-Derived  
887 Suppressor Cells. *PLoS Biol.* **13**, e1002330 (2015).
- 888 65. Nair, J. R. *et al.* Novel inhibition of PIM2 kinase has significant anti-  
889 tumor efficacy in multiple myeloma. *Leukemia* **31**, 1715–1726 (2017).
- 890 66. Jiménez-García, M. P. *et al.* The role of PIM1/PIM2 kinases in tumors of  
891 the male reproductive system. *Sci Rep* **6**, 38079 (2016).
- 892 67. Xia, R. *et al.* SUZ12 promotes gastric cancer cell proliferation and  
893 metastasis by regulating KLF2 and E-cadherin. *Tumour Biol.* **36**, 5341–  
894 5351 (2015).
- 895 68. Sizemore, G. M., Pitarresi, J. R., Balakrishnan, S. & Ostrowski, M. C.  
896 The ETS family of oncogenic transcription factors in solid tumours. *Nat*  
897 *Rev Cancer* **17**, 337–351 (2017).
- 898 69. Zhang, G. *et al.* FOXA1 defines cancer cell specificity. *Sci Adv* **2**,  
899 e1501473–e1501473 (2016).
- 900 70. John Clotaire, D. Z. *et al.* MiR-26b inhibits autophagy by targeting ULK2  
901 in prostate cancer cells. *Biochem. Biophys. Res. Commun.* **472**, 194–  
902 200 (2016).
- 903 71. Pearson, B. J. & Alvarado, A. S. A planarian p53 homolog regulates  
904 proliferation and self-renewal in adult stem cell lineages. *Development*  
905 **137**, 213–221 (2009).
- 906 72. Zhang, Z. *et al.* Mammary-Stem-Cell-Based Somatic Mouse Models  
907 Reveal Breast Cancer Drivers Causing Cell Fate Dysregulation.

- 908 *CellReports* **16**, 3146–3156 (2016).
- 909 73. Reya, T., Morrison, S. J., Clarke, M. F. & Weissman, I. L. Stem cells,  
910 cancer, and cancer stem cells. *Nature* **414**, 105–111 (2001).
- 911 74. Dean, M., Fojo, T. & Bates, S. Tumour stem cells and drug resistance.  
912 *Nat Rev Cancer* **5**, 275–284 (2005).
- 913 75. Cebria, F. Planarian homologs of netrin and netrin receptor are required  
914 for proper regeneration of the central nervous system and the  
915 maintenance of nervous system architecture. *Development* **132**, 3691–  
916 3703 (2005).
- 917 76. King, R. S. & Newmark, P. A. In situ hybridization protocol for enhanced  
918 detection of gene expression in the planarian *Schmidtea mediterranea*.  
919 *BMC Dev. Biol.* **13**, 8 (2013).
- 920 77. Gonzalez-Estevez, C., Arseni, V., Thambyrajah, R. S., Felix, D. A. &  
921 Aboobaker, A. A. Diverse miRNA spatial expression patterns suggest  
922 important roles in homeostasis and regeneration in planarians. *Int. J.*  
923 *Dev. Biol.* **53**, 493–505 (2009).
- 924 78. Cebria, F. & Newmark, P. A. Morphogenesis defects are associated  
925 with abnormal nervous system regeneration following roboA RNAi in  
926 planarians. *Development* **134**, 833–837 (2007).
- 927 79. Romero, B. T., Evans, D. J. & Aboobaker, A. A. in *Progenitor Cells* **916**,  
928 167–179 (Humana Press, 2012).
- 929 80. Bolger, A. M., Lohse, M. & Usadel, B. Trimmomatic: a flexible trimmer  
930 for Illumina sequence data. *Bioinformatics* **30**, 2114–2120 (2014).
- 931 81. Robb, S. M. C., Gotting, K., Ross, E. & Sánchez Alvarado, A. SmedGD  
932 2.0: The *Schmidtea mediterranea* genome database. *Genesis* **53**, 535–  
933 546 (2015).
- 934 82. Attrill, H. *et al.* FlyBase: establishing a Gene Group resource for  
935 *Drosophila melanogaster*. *Nucleic Acids Research* **44**, D786–92 (2016).
- 936 83. Bray, N. L., Pimentel, H., Melsted, P. & Pachter, L. Near-optimal  
937 probabilistic RNA-seq quantification. *Nat Biotech* **34**, 525–527 (2016).
- 938 84. Pimentel, H. J., Bray, N., Puente, S., Melsted, P. & Pachter, L.  
939 Differential analysis of RNA-Seq incorporating quantification  
940 uncertainty. (2016). doi:10.1101/058164
- 941 85. Pimentel, H. J., Bray, N., Puente, S., Melsted, P. & Pachter, L.  
942 Differential analysis of RNA-Seq incorporating quantification  
943 uncertainty. (2016). doi:10.1101/058164

## 944 **Figure legends**

946 **Figure 1. *S. mediterranea* has three partial *MLL3/4* orthologs expressed in**  
947 **stem cells.**

948 (a) A schematic depicting the structure and domain composition of  
949 MLL3/MLL4 proteins in *D. melanogaster*, *H. sapiens* and *S. mediterranea*.

950 (b) genes' expression pattern in wildtype (WT) and two days following a lethal  
951 dose (60 Gy) of gamma irradiation (PI = post-irradiation). *Porcupine-1*  
952 (expressed in the irradiation-insensitive cells of the differentiated gut) and

953 *H2B* (expressed in the irradiation-sensitive neoblasts) are used as a negative  
954 and positive control respectively. Ten worms per condition were used.  
955 (c) White arrows point to examples of cells double-positive for *Mll3/4*  
956 transcripts and *H2B* transcripts. The schematic shows the body area imaged.  
957 (d) Graph showing the raw cell counts used for percentage estimates in (c).  
958 Green colour represents all counted *H2B*-positive cells, yellow represents  
959 *H2B*-positive cells also expressing an *Mll3/4* ortholog. Error bars represent  
960 Standard Error of the Mean (SEM). Ten animals per condition were used.

961

962

963 **Figure 2. *LPT*(RNAi) results in differentiation defects and outgrowth**  
964 **formation during regeneration.**

965 (a) A schematic showing the amputation of RNAi worms into head (H), middle  
966 (M) and tail (T) pieces in order to observe regeneration of different structures.  
967 The time-course of all the experiments on *Mll3/4* knockdown animals is  
968 depicted underneath the worm schematic. A total of 9 days of dsRNA  
969 microinjection-mediated RNAi was followed by amputation on the 10<sup>th</sup> day and  
970 subsequent observation of regeneration.

971 (b) Head, middle and tail pieces following *LPT*(RNAi) or control *GFP*(RNAi) at  
972 day 7 of regeneration. Yellow arrows point towards the defects in blastema  
973 formation.

974 (c) Head, middle and tail pieces following *LPT*(RNAi) or control *GFP*(RNAi) at  
975 day 11 of regeneration. Red arrows point towards outgrowths.

976 (d) Homeostatic animals following *LPT*(RNAi) or control *GFP*(RNAi) at day 14  
977 post RNAi. Red arrows point towards outgrowths.

978 (e) Gut regeneration and maintenance in middle pieces following *LPT*(RNAi),  
979 as illustrated by RNA probe for the gene *porcupine-1* at 8 days of  
980 regeneration.

981 (f) Brain regeneration in middle pieces at 8 days post-amputation following  
982 *LPT*(RNAi), as illustrated by anti-SYNORF-1 antibody labeling the central  
983 nervous system (CNS).

984 (g) Optic chiasm recovery in tail pieces at 8 days of regeneration following  
985 *LPT*(RNAi), as shown by anti-VC-1 antibody.

986 (h) Recovery of optic cups and organized trail of optic cup precursor cells in  
987 tail pieces at 8 days of regeneration following *LPT*(RNAi), as demonstrated by  
988 RNA probe for *SP6-9*.

989 (i) Pharynx recovery in head pieces at 8 days of regeneration following  
990 *LPT*(RNAi), as illustrated by RNA probe for *laminin*.

991

992

993 **Figure 3. LPT controls differentiation across neuronal and epidermal**  
994 **lineages.**

995 (a) Quantification of the number of GABAergic neurons (labeled by *GAD*), (b)  
996 dopaminergic neurons (labeled by *TH*), (c) acetylcholinergic neurons (labeled  
997 by *ChAT*), (d) serotonergic neurons (labeled by *TPH*) and (e) early (labeled by  
998 *prog-1*) and late (labeled by *AGAT-1*) epidermal stem cell progeny at 8 days  
999 of regeneration following *LPT*(RNAi). 2-tailed t-test was used for all  
1000 comparisons; \* $p < 0.05$ , \*\*\* $p < 0.001$ . Error bars represent Standard Error of the  
1001 Mean (SEM). Ten animals per condition per experiment were assessed over  
1002 the course of two separate experiments.

1003

1004

1005 **Figure 4. Over-proliferation and mitotic cell clustering precedes and**  
1006 **accompanies the emergence of outgrowths in *LPT*(RNAi) regenerating**  
1007 **animals.**

1008 (a) Quantification of mitotic cells (labeled by anti-H3P antibody) at different  
1009 post-amputation time-points following *LPT*(RNAi). N=10 animals per time-  
1010 point. 2-tailed t-test was used for analysis; \* $p < 0.05$ . Error bars represent  
1011 Standard Error of the Mean (SEM).

1012 (b) Examples of middle pieces at the time-points post-amputation showing  
1013 significant difference in mitotic cell (white) counts according to (a). 'ph'  
1014 indicates the pharynx. The red arrows point towards clusters of mitotic cells in  
1015 late stage regenerates (192 hrs./8 days).

1016 (c) Mitotic cells (white) are always restricted to mesenchyme tissue in  
1017 *GFP*(RNAi) animals but are penetrated into epidermal outgrowths in  
1018 *LPT*(RNAi) animals. Orange line indicates the tentative border of  
1019 mesenchyme.

1020

1021

1022 **Figure 5. Pluripotent as well as lineage restricted stem cells are present**  
1023 **in outgrowths of *LPT*(RNAi) animals.**

1024 (a) Head piece showing distribution of *Sigma* stem cells in *GFP*(RNAi) and  
1025 *LPT*(RNAi) animals. *Sigma* stem cells are double positive for *smedwi-1* and  
1026 the '*Sigma pool*' of RNA probes (*Soxp1*, *Soxp2*). White arrows in *LPT*(RNAi)  
1027 animals point towards the outgrowth. Red arrows indicate a double-positive  
1028 cell magnified in red inset box. Scale bars: 200  $\mu$ m.

1029 (b) Images showing distribution of *Zeta* stem cells in *GFP*(RNAi) and  
1030 *LPT*(RNAi) animals. *Zeta* stem cells are double positive for *smedwi-1* and the  
1031 '*Zeta pool*' of RNA probes (*zfp-1*, *Soxp3*, *egr-1*). White arrows in *LPT*(RNAi)  
1032 animals point towards the outgrowth. Red arrows indicate a double-positive  
1033 cell magnified in red inset box. Scale bars: 200  $\mu$ m.

1034 (c) Images showing distribution of *Gamma* stem cells in *GFP*(RNAi) and  
1035 *LPT*(RNAi) animals. *Gamma* stem cells are double positive for *smedwi-1* and  
1036 the '*Gamma pool*' of RNA probes (*gata4/5/6*, *hnf4*). White arrows in  
1037 *LPT*(RNAi) animals point towards the outgrowth. Red arrows indicate a  
1038 double-positive cell magnified in red inset box. Scale bars: 200  $\mu$ m.

1039

1040

1041 **Figure 6. *LPT*(RNAi) results in a cancer-like phenotype.**

1042 A summary of the differentiation and neoblast proliferation data presented,  
1043 together with a simplified flowchart illustrating the tested lineages'  
1044 development under knockdown conditions. A red cross sign indicates where  
1045 the defect in a lineage is detected following *LPT*(RNAi).

1046

1047

1048 **Figure 7. RNA-seq of G2/M stem cells following *LPT*(RNAi) reveals**  
1049 **effects on genes enriched in different cell populations.**

1050 (a) Genes were classified according to their proportional expression in the X1  
1051 (G2/M stem cells; dark blue), X2 (G1 stem cells and stem cell progeny; light  
1052 blue) and X ins (differentiated cells; orange) FACS populations of cells. Genes  
1053 were defined as enriched in certain population(s) if more than 50% of their

1054 expression is observed in that population in wild type animals. Each vertical  
1055 line represents a gene. Under the population expression enrichment track is a  
1056 track with all the significantly up- and down-regulated genes in G2/M stem  
1057 cells following *LPT*(RNAi). The genes with fold change  $>1.5$  ( $p<0.05$ ) are  
1058 shown in red following a log2 fold change transformation. The genes with fold  
1059 change  $<-1.5$  ( $p<0.05$ ) are shown in blue following a log2 fold change  
1060 transformation. The Wald's test (as part of the Sleuth software) was used for  
1061 assessing differential expression.

1062 (b) Enrichment for genes in each of the three classes was calculated for the  
1063 up- and down-regulated genes' list (red and blue respectively). The number of  
1064 genes in each group is indicated in brackets under the group's name.  
1065 Numbers in white represent significant enrichment ( $p<0.01$ ) according to a  
1066 hypergeometric enrichment test.

1067 (c) Gene Ontology (GO) enrichment analysis on the genes significantly up-  
1068 regulated (red) and down-regulated (blue) in G2/M stem cells following  
1069 *LPT*(RNAi). Categories are sorted by average Log2 fold change of the up- or  
1070 down-regulated genes falling in each category. In bold are shown terms that  
1071 relate to the described *Mll3/4* loss of function phenotype.

1072

1073

1074 **Figure 8. *LPT*(RNAi) is mainly manifested in changes in H3K4me1 and**  
1075 **H3K4me3 around the TSS in G2/M (X1) stem cells.**

1076 (a) Graphs presenting the average read coverage across the genome for  
1077 H3K4me3, H3K4me1 and H3K27me3 after performing ChIP-seq on X1 (G2/M  
1078 stem cells). The graphs are centered on the TSS (showing 2 kb upstream and  
1079 downstream) and the data is normalised to *Drosophila* S2 signal spike-in. The  
1080 input coverage is subtracted. Log2 fold change graphs are also shown for  
1081 each histone modification, where signal above zero shows increase following  
1082 *LPT*(RNAi) and signal below zero represents a decrease. Three colours are  
1083 used for different gene classes – dark blue (genes enriched in G2/M stem  
1084 cells, i.e. X1), light blue (genes enriched in G1 stem cells and stem cell  
1085 progeny, i.e. X2), orange (genes enriched in differentiated cells, i.e. X ins).  
1086 Standard deviation is shown by a faded colour around each line.



1087 (b) Spearman's rank correlation between changes in RNA-seq signal  
1088 following *LPT*(RNAi) and H3K4me1 or H3K4me3 ChIP-seq signal for the  
1089 region around the TSS of genes from different enrichment classes (only  
1090 examples where a significant correlation exists are shown). The green line  
1091 shows a correlation where RNA-seq fold change data was filtered for Log2  
1092 fold changes  $\leq -1$  and  $\geq +1$ . Faded areas of the lines represent results not  
1093 significant at  $p < 0.001$ , while darker colours represent results significant at  
1094  $p < 0.001$ .

1095

1096

1097 **Figure 9. Double knockdown with *Elf5* or *pim-2-like* alleviates the**  
1098 ***LPT*(RNAi) over-proliferation and outgrowth phenotype.**

1099 (a) Examples of genes significantly ( $p < 0.05$ ) up-regulated in G2/M stem cells  
1100 following *LPT*(RNAi). The ChIP-seq profile for H3K4me3 or H3K4me1 in the 2  
1101 kb region around the TSS of each gene is presented. Purple colour  
1102 represents normalised signal following *LPT*(RNAi) and green colour is used to  
1103 show the normalised signal following *GFP*(RNAi). The bold font of the gene  
1104 names signifies a correlation between the genes' up-regulation and their  
1105 respective H3K4me3/me1 profile. 'TF' stands for 'transcription factor'. All three  
1106 genes show correlation between ChIP-seq profile and up-regulation in RNA-  
1107 seq data.

1108 (b) *in silico* analysis ([www.oncomine.org](http://www.oncomine.org); t-test,  $p < 0.0001$ ) of *Mll3* and *pitx2*  
1109 expression in normal tissue (cerebellum) and cancer tissue  
1110 (medulloblastoma).

1111 (c) *pitx* and *smedwi-1* *in situ* hybridization at 8 days of regeneration of middle  
1112 pieces following *LPT*(RNAi). White arrows show double-positive cells. 2-tailed  
1113 t-test used for analysis,  $n=10$ ,  $*p < 0.05$ .

1114 (d) Representative examples of mitotic cells (labeled by anti-H3P antibody) in  
1115 double RNAi condition at 48h post amputation.

1116 (e) Graph showing number of mitotic cells in double RNAi animals at 48h post  
1117 amputation. Each dot represents average number of mitotic cells in single  
1118 worm ( $n=5$ ). Lines and error bars indicate mean and SD. Student's t test:  
1119  $*p < 0.05$ .

1120 (f) Graph showing percentage quantification of double knockdown  
1121 regenerates developing outgrowths.

1122

1123

1124 **Figure 10. *LPT*(RNAi) down-regulates the expression of genes involved**  
1125 **in stem cell proliferation and differentiation.**

1126 (a) Examples of genes significantly ( $p < 0.05$ ) down-regulated in G2/M stem  
1127 cells following *LPT*(RNAi). The ChIP-seq profile for H3K4me3 in the 2 kb  
1128 region around the TSS of each gene is presented. Bold font of a gene name  
1129 illustrates an example where there is a correlation between H3K4me3 profile  
1130 and down-regulation in RNA-seq data. 'TF' stands for 'transcription factor'.

1131 (b) Representative bright field images of 18 day regenerating animals  
1132 following different RNAi. *PRDM1-1*(RNAi), *cut-like1*(RNAi) and  
1133 *RREBP1*(RNAi) animals show defective anterior regeneration compared to  
1134 *GFP*(RNAi) animals. Scale bar: 200  $\mu$ m.

1135 (c) Representative images of mitotic cells (labeled by anti-H3P antibody) in  
1136 different RNAi animals at 48h and 7 days post-amputation. Scale bar: 100  $\mu$ m.  
1137 Graphs show mitotic cell quantification. Each dot represents average number  
1138 of mitotic cells in single worm ( $n=5$ ). Lines and error bars indicate mean and  
1139 SD. Student's t test:  $*p < 0.05$ .

1140 (d) Representative images showing stem cells (*smedwi-1*<sup>+</sup>) and early  
1141 epidermal progeny (*prog-1*<sup>+</sup>) at 7 and 18 day regenerating animals from  
1142 different RNAi conditions. Graphs show quantification of stem cells and early  
1143 epidermal progeny ( $n=5$ ). Lines and error bars indicate mean and SD.  
1144 Student's t test:  $*p < 0.05$ .

1145

1146

1147 **Supplementary Information**

1148

1149 **Supplementary Figure 1. Structure and function of COMPASS and**  
1150 **COMPASS-like core proteins.**

1151 (a) Schematics of the core subunits of the COMPASS and the two  
1152 COMPASS-like complexes in mammals are presented with coloured boxes

1153 corresponding to different protein domains – RRM1 (RNA-recognition motif),  
1154 N-SET, SET, CXXC (zinc finger), PHD (Plant Homeodomain fingers), zf  
1155 (PHD-like zinc finger), FYRN (Phenylalanine/Tyrosine rich N-terminus  
1156 domain), FYRC (Phenylalanine/Tyrosine rich C-terminus domain), purple  
1157 stars signifying nuclear receptor recognition motifs. Dashed vertical line  
1158 represents proteolytic cleavage. **(b)** As in **(a)**, but in fruitfly. **(c)** Proposed  
1159 mechanisms of action of each core complex subunit. COMPASS complex – 1)  
1160 performing H3K4 trimethylation on TSS of most actively transcribed genes  
1161 and 2) depositing H3K4me2 on the gene bodies of actively transcribed genes.  
1162 MLL1/2/Trithorax COMPASS-like complex – 1) a role in transcriptional  
1163 activation of Hox genes via trimethylating H3K4 on TSS of their promoters  
1164 and 2) MLL2 is involved in trimethylation of H3K4 on TSS of bivalent  
1165 promoters. MLL3/4/LPT/Trr – 1) role in hormone-dependent transcription –  
1166 when the Nuclear Receptor protein (NR) is bound to the DNA Hormone  
1167 Response Element (HRE) upon Hormone Ligand (HL) detection,  
1168 MLL3/4/LPT/Trr complex binds the nuclear receptor and serves as its co-  
1169 activator via trimethylating H3K4 and promoting active transcription on  
1170 selected loci; 2) a switch between inactive and active enhancer states where  
1171 MLL3/4/LPT/Trr complex deposits H3K4me1 on both active and inactive  
1172 enhancers; upon UTX recruitment, it demethylates H3K27me3 and allows for  
1173 CBP/p300 to acetylate H3K27 and activate the enhancer; 3) a switch between  
1174 active and inactive promoters - MLL3/4/LPT/Trr complex bound to TSS  
1175 deposits H3K4me1 on the TSS and around it, leads to repressed transcription  
1176 of the gene; when H3K4me1 is depleted from the TSS and another complex  
1177 performs trimethylation of H3K4 on TSS, this is correlated with activated  
1178 transcription. **(d)** Schematic representation of planarian COMPASS and  
1179 COMPASS-like core subunits. SMED-LPT (in red) is characterized in the  
1180 present study. **(e)** Planarian COMPASS and COMPASS-like core subunits'  
1181 expression in the three populations of cells sortable by fluorescence-activated  
1182 cell sorting (FACS) (X1=G2/M stem cells, X2=G1 stem cells and stem cell  
1183 progeny, X ins=differentiated cells) according to RNA-seq data. **(f)** Known  
1184 defects after RNAi-mediated knockdown of core COMPASS and COMPASS-  
1185 like subunits in planarians.  
1186

1187 **Supplementary Figure 2. Planarian *MLL3/4* genes are expressed in**  
1188 **neoblasts and neoblast progeny and colocalise with each other.**

1189 (a) Protein alignment of conserved regions of COMPASS-like families' core  
1190 proteins. Asterisks indicate complete conservation in all sequences, while  
1191 black boxes are drawn around areas of conservation specific to the  
1192 MLL3/4/Trithorax-related family. Colours represent similarity of amino acids.  
1193 The image was produced using MEGA.5.2 software.

1194 (b) Bright field images of head, middle and tail pieces following *trr-1*(RNAi),  
1195 *trr-2*(RNAi) or control *GFP*(RNAi) at day 8 of regeneration. Yellow arrows  
1196 point towards the regenerative defects – smaller blastema, delayed eye  
1197 formation or posterior bloating.

1198 (c) Head, middle and tail pieces following *trr-1*(RNAi), *trr-2*(RNAi) or control  
1199 *GFP*(RNAi) at day 14 of regeneration.

1200 (d) Central nervous system (CNS) maintenance and recovery at 8 days of  
1201 middle piece regeneration, as labeled by CNS-specific anti-SYNORF-1  
1202 antibody, following *trr-1*(RNAi) or *trr-2*(RNAi).

1203 (e) Bright field images of head, middle and tail pieces at 3 days of  
1204 regeneration following *GFP/GFP*(RNAi), *trr-1/trr-2*(RNAi), *GFP/trr-2*(RNAi),  
1205 *GFP/trr-1*(RNAi) and *GFP/LPT*(RNAi). Red arrows point towards outgrowths.

1206 (f) Survival curve of middle regenerating pieces in different RNAi conditions.  
1207 The *GFP/GFP*(RNAi) line overlaps with *GFP/trr-1*(RNAi) and *GFP/trr-2*(RNAi).  
1208 n=10.

1209

1210 **Supplementary Figure 3. *Trr-2*(RNAi) regenerating animals produce less**  
1211 **GABAergic and dopaminergic neurons.**

1212 (a) Quantification of the number of GABAergic neurons (labeled by *GAD*), (b)  
1213 dopaminergic neurons (labeled by *TH*), (c) serotonergic neurons (labeled by  
1214 *TPH*), (d) acetylcholinergic neurons (labeled by *chat*) and (e) early (labeled by  
1215 *prog-1*) and late (labeled by *AGAT-1*) epidermal stem cell progeny at 8 days  
1216 of regeneration of tail or middle pieces following *trr-1*(RNAi) or *trr-2*(RNAi). 2-  
1217 tailed t-test used for analysis, n=10, \*p<0.05. Error bars represent Standard  
1218 Error of the Mean (SEM).

1219

1220 **Supplementary Figure 4. *Sigma*, *zeta* and *gamma* neoblast numbers are**

1221 **unchanged following *LPT*(RNAi).**

1222 (a) FISH showing cells in 8 days of regenerating animals following *LPT*(RNAi)  
1223 labeled by the *sigma pool* of RNA probes (*Soxp1*, *Soxp2*) and *smewi-1*.  
1224 White arrows point towards *sigma* neoblasts (double-positive for *sigma pool*  
1225 and *smewi-1*).

1226 (b) FISH showing cells in 8 days of regenerating animals following *LPT*(RNAi)  
1227 labeled by the *zeta pool* of RNA probes (*zfp-1*, *Soxp3*, *egr-1*) and *smewi-1*.  
1228 White arrows point towards *zeta* neoblasts (double-positive for *zeta pool* and  
1229 *smewi-1*).

1230 (c) FISH showing cells in 8 days of regenerating animals following *LPT*(RNAi)  
1231 labeled by the *gamma pool* of RNA probes (*gata4/5/6*, *hnf4*) and *smewi-1*.  
1232 White arrows point towards *gamma* neoblasts (double-positive for *gamma*  
1233 *pool* and *smewi-1*).

1234 (d-g) Graphs showing quantification of *sigma* (d), *zeta* (e), *gamma* (f) and  
1235 total *smewi-1*<sup>+</sup> (g) neoblasts in 8-day regenerating animals following  
1236 *LPT*(RNAi). Each dot represents average number of cells in a single worm  
1237 (n=5). Lines and error bars indicate mean and SD. Student's t test: \*p<0.05.

1238

1239 **Supplementary Figure 5. *LPT*(RNAi) results in disorganized outgrowth-**  
1240 **focused expression of epidermal precursor markers, epithelial disarray,**  
1241 **hypertrophy and changes of nuclear morphology.**

1242 (a) Anterior part (containing an outgrowth) of a tail piece at 18 days of  
1243 regeneration following *LPT*(RNAi) labeled with *prog-1* and *AGAT-1* epidermal  
1244 precursor markers. 'CG' stands for 'cephalic ganglia'.

1245 (b) The epidermal layer (stained with Hoechst 33342) of a tail piece at 10  
1246 days of regeneration following *LPT*(RNAi) compared to control.

1247 (c) Graph showing increase in nuclear area following *LPT*(RNAi). 2-tailed t-  
1248 test used for analysis, n=20, \*\*\*p<0.001.

1249 (d) Image showing changes in nuclear morphology of epidermal cells in 10-  
1250 day regenerating animals following *LPT*(RNAi). Nuclei were stained with  
1251 Hoechst 33342. Yellow arrows point towards misshapen nuclei.

1252

1253 **Supplementary Table 1. Differentially expressed loci following**  
1254 ***LPT*(RNAi).**

1255 Each row represents one locus that was differentially expressed with a p-  
1256 value less than 0.05 and fold change <-1.5 or >1.5. The Wald's test (as part of  
1257 the Sleuth software) was used for assessing differential expression. The top  
1258 BLAST hit (with e-value) and the common model organism top BLAST hit is  
1259 also provided for each locus.

1260

1261 **Supplementary Figure 6. Histone modification ChIP-seq profiles at**  
1262 **promoter-proximal regions of different classes of genes.**

1263 (a-c) Images show histone modification patterns for H3K4me3 (a), H3K4me1  
1264 (b) and H3K27me3 (c) respectively. ChIP-seq signal is shown in black. Three  
1265 classes of genes are presented – enriched >50% in X1 (G2/M stem cells)  
1266 shown by dark blue, enriched >50% in X2 (G1 stem cells and stem cell  
1267 progeny) shown in light blue, enriched >50% in X ins (differentiated cells)  
1268 shown in orange. Histone modification graphs are centered on the  
1269 Transcriptional Start Site (TSS) with 2.5 kb shown upstream and downstream.

1270

1271 **Supplementary Figure 7. Simultaneous knockdown of LPT with Elf5 or**  
1272 **pim-2 like results in partial recovery of the LPT(RNAi) regenerative**  
1273 **phenotype.**

1274 (a) Examples of genes significantly ( $p < 0.05$ ) up-regulated in G2/M stem cells  
1275 following *LPT*(RNAi). The ChIP-seq profile for H3K4me3 in the 2 kb region  
1276 around the TSS of each gene is presented. Purple colour represents  
1277 normalised signal following *LPT*(RNAi) and green colour is used to show the  
1278 normalised signal following *GFP*(RNAi). 'TF' stands for 'transcription factor'.  
1279 Bold font of a gene name illustrates an example where there is a correlation  
1280 between H3K4me3 profile and up-regulation in RNA-seq data.

1281 (b) Representative examples of mitotic cells (labeled by anti-H3P antibody) in  
1282 double RNAi condition at 48h post amputation.

1283 (c) Bright field images showing partial recovery in 10 day regenerating  
1284 animals following *Elf5/LPT*(RNAi) and *pim-2 like/LPT*(RNAi) compared to  
1285 *GFP/LPT*(RNAi). Other genes screened failed to recover the regeneration  
1286 defects.

1287

1288 **Supplementary Figure 8. RNAi of genes up-regulated following**

1289 ***LPT*(RNAi) did not result in defects in regeneration or stem cell**  
1290 **proliferation.**

1291 (a) Bright field images showing regeneration following RNAi of different genes  
1292 up-regulated in *LPT*(RNAi).

1293 (b) Images showing mitotic cells (labeled by anti-H3P antibody) in  
1294 regenerating animals following knockdown of different genes up-regulated in  
1295 *LPT*(RNAi). Graph showing mitotic cell quantification following gene  
1296 knockdowns.

1297

1298 **Supplementary Figure 9. Knockdown of some genes down-regulated**  
1299 **following *LPT*(RNAi) does not result in regeneration defects.**

1300 (a) Examples of genes significantly ( $p < 0.05$ ) down-regulated in G2/M stem  
1301 cells following *LPT*(RNAi). The ChIP-seq profile for H3K4me3 and H3K4me1  
1302 in the 2 kb region around the TSS of each gene is presented. Purple colour  
1303 represents normalised signal following *LPT*(RNAi) and green colour is used to  
1304 show the normalised signal following *GFP*(RNAi). 'TF' stands for 'transcription  
1305 factor'. Bold font of a gene name illustrates an example where there is a  
1306 correlation between H3K4me3 profile and down-regulation in RNA-seq data.

1307 (b) Bright field images of 18-day regenerating animals following RNAi of  
1308 different genes down-regulated in *LPT*(RNAi). Scale bar: 200  $\mu\text{m}$ .

1309 (c) Representative examples of mitotic cells (labeled by anti-H3P antibody) at  
1310 48h and 7 day post amputation in regenerating animals following knockdown  
1311 of different genes down-regulated in *LPT*(RNAi). Scale bar: 100  $\mu\text{m}$ . Graphs  
1312 show the quantification of mitotic cells. Each dot represents average number  
1313 of mitotic cells in a single worm ( $n=5$ ). Lines and error bars indicate mean and  
1314 SD. Student's t test was used for analysis.

1315 (d) Representative FISH images showing stem cells (*smedwi-1*<sup>+</sup>) and early  
1316 epidermal progeny (*prog-1*<sup>+</sup>) at 7 day regenerating animals in different RNAi  
1317 conditions. Scale bar: 100  $\mu\text{m}$ . Graph shows the quantification of *smedwi-1*<sup>+</sup>  
1318 and *prog-1*<sup>+</sup> cells ( $n=5$ ). Lines and error bars indicate mean and SD. Student's  
1319 t test used for analysis.

1320

1321 **Supplementary Figure 10. Mis-regulation of genes following *LPT*(RNAi)**  
1322 **correlates with mis-regulation in human cancers where *MII3* levels are**

1323 **decreased.**

1324 *In silico* analysis ([www.oncoPrint.org](http://www.oncoPrint.org); t-test,  $p < 0.0001$ ) of *Mll3*, *IGFALS*, *p53*,  
1325 *ULK2*, *TBX1* and *cut-like* expression in normal tissue (cerebellum or different  
1326 B-lymphocyte types) and cancer tissue (medulloblastoma, follicular lymphoma  
1327 or Hodgkin's lymphoma). Positive and negative numbers next to gene names  
1328 indicate up- or down-regulation in *LPT*(RNAi) X1 RNA-seq respectively.

1329

1330 **Supplementary Table 2. Primer sequences.** All primers are given in 5'→3'  
1331 orientation. 'F' and 'R' stand for 'forward' and 'reverse' primer respectively.

1332

1333 **Supplementary Figure 11. The histone modifications antibodies used for**  
1334 **ChIP-seq experiments are specific.**

1335 (a) Western blot with anti-H3K4me1 and loading control anti-H3 (unmodified  
1336 histone H3) on protein lysate from *GFP*(RNAi) and *LPT*(RNAi) animals.

1337 (b) Western blot with anti-H3K4me3 and loading control anti-H3 (unmodified  
1338 histone H3) on protein lysate from *GFP*(RNAi) and *set1*(RNAi) animals.

1339 (c) Western blot with anti-H3K27me3 and loading control anti-H3 (unmodified  
1340 histone H3) on protein lysate from *GFP*(RNAi) and *utx*(RNAi) animals.

1341

1342 **Supplementary Figure 12. Summary of planarian ChIP-seq procedure.**

1343 Three day-regenerating planarians were dissociated into single cells. Cells  
1344 were stained with Hoechst 34580 and Calcein AM in order to visualize cell  
1345 populations according to nuclear size and cytoplasmic complexity. The X1  
1346 (G2/M) stem cells (magenta) were sorted and mixed with 4% *Drosophila* S2  
1347 cells. Cells were crosslinked with 1% Formaldehyde and sonicated.  
1348 Immunoprecipitation with anti-H3K4me3, anti-H3K4me1 and anti-H3K27me3  
1349 antibodies followed. Samples were reverse-crosslinked and libraries were  
1350 prepared using NEBNext Ultra II library preparation kit.

1351

1352

1353 **Supplementary Note 1. Supplementary Python Notebook.**

1354 Provides details on the ChIP-seq and RNA-seq bioinformatics analyses.

1355



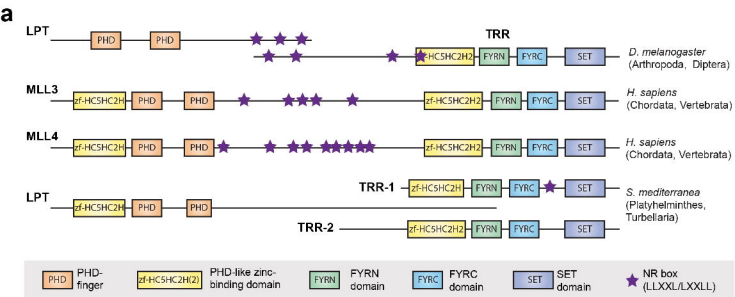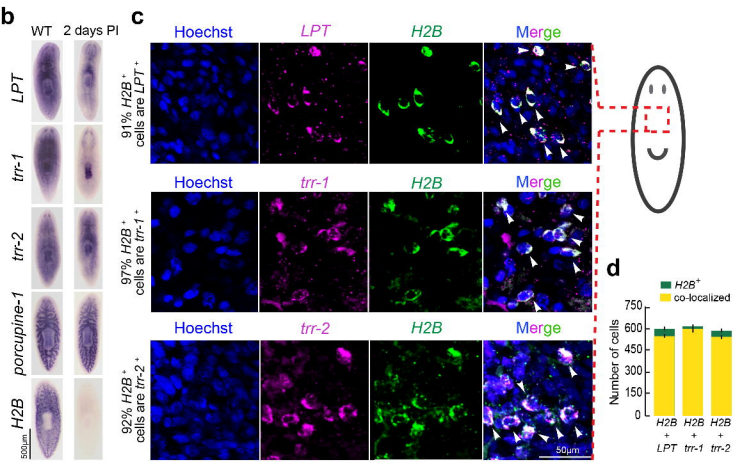

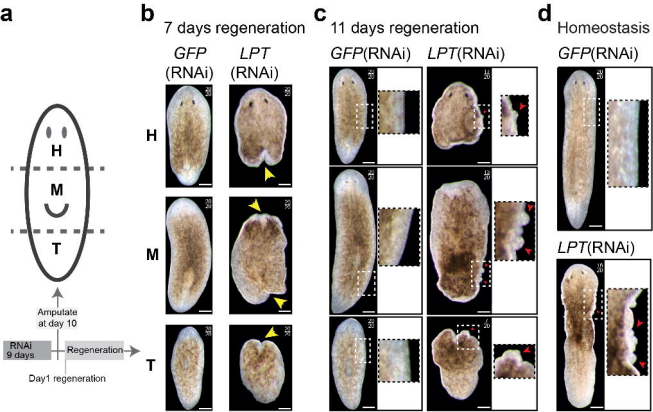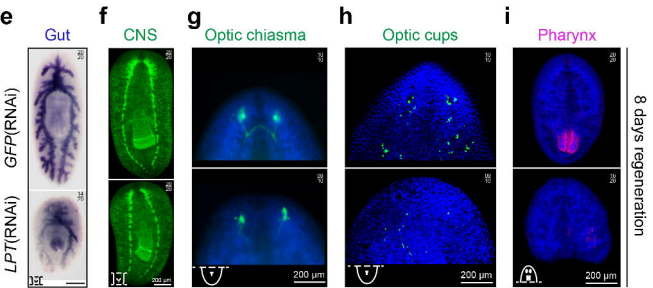

# 8 days regeneration

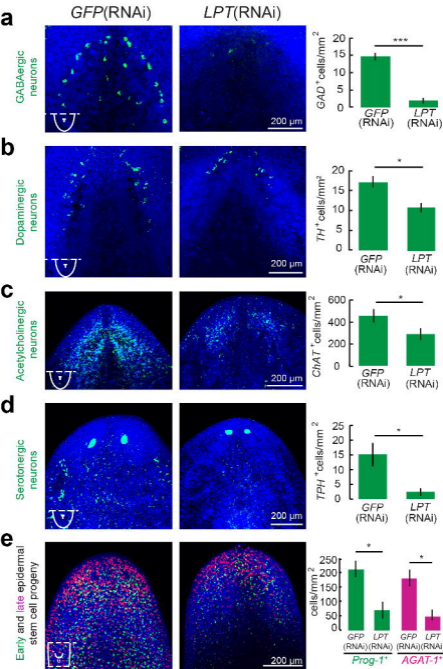



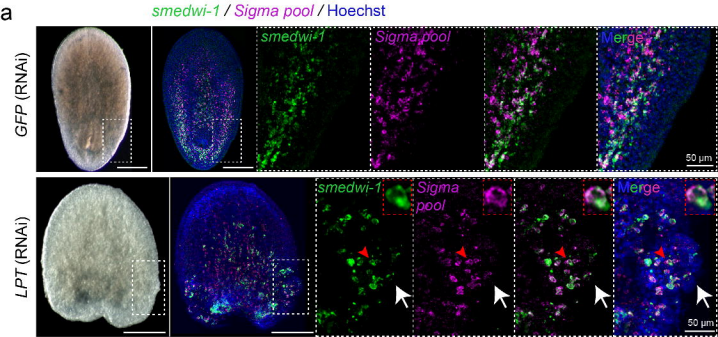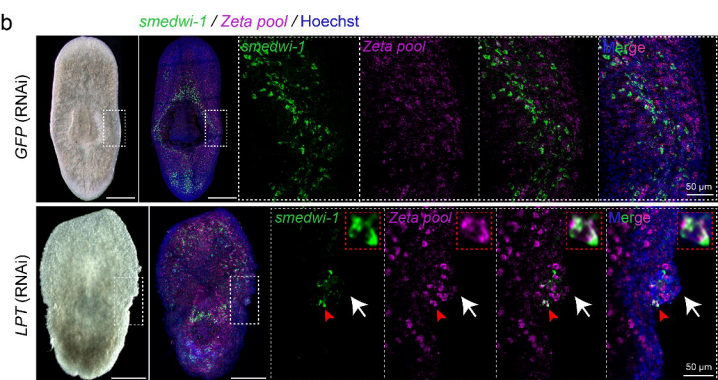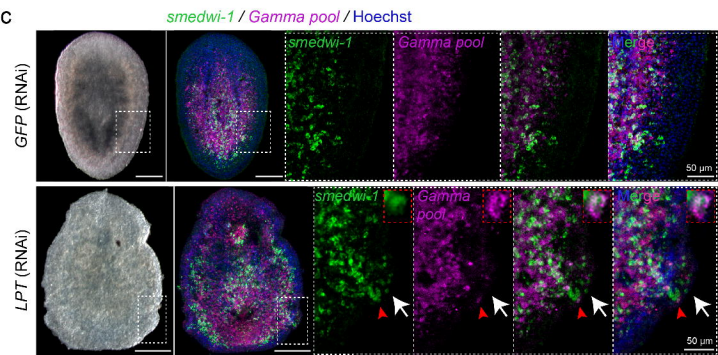

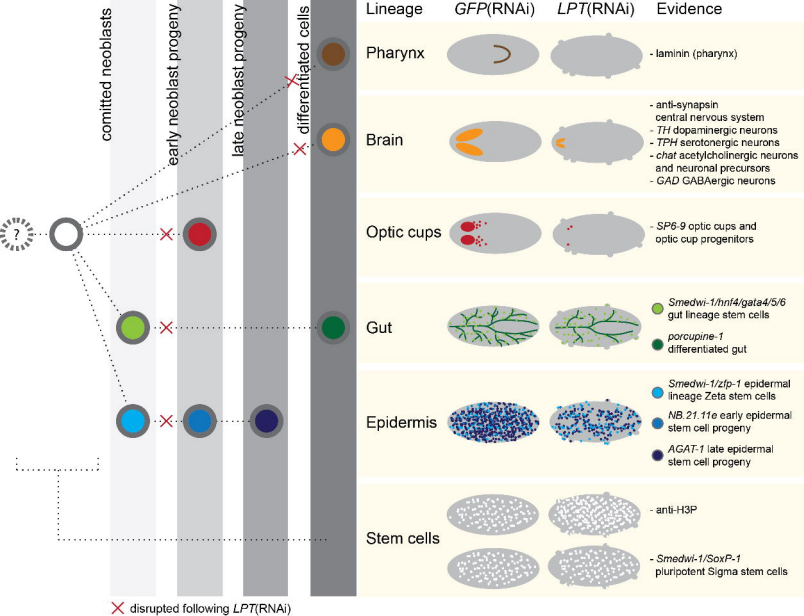

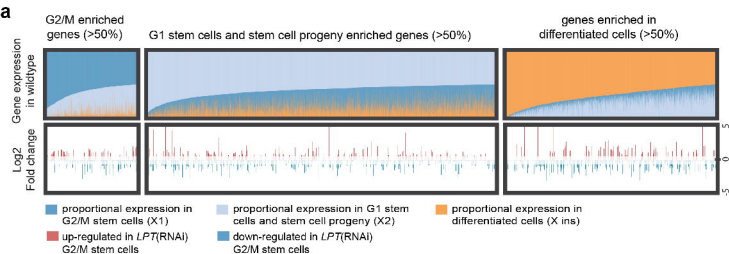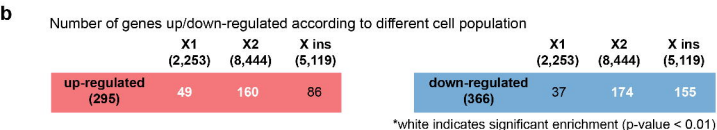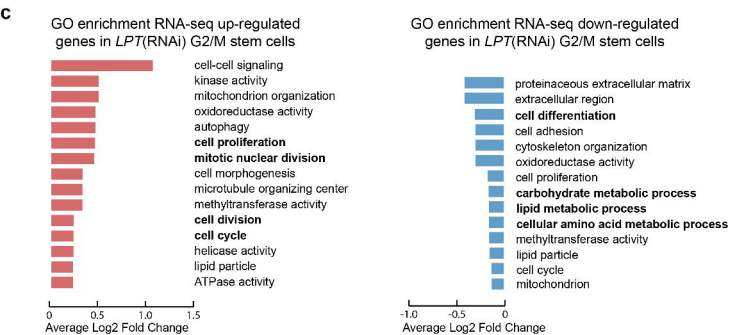

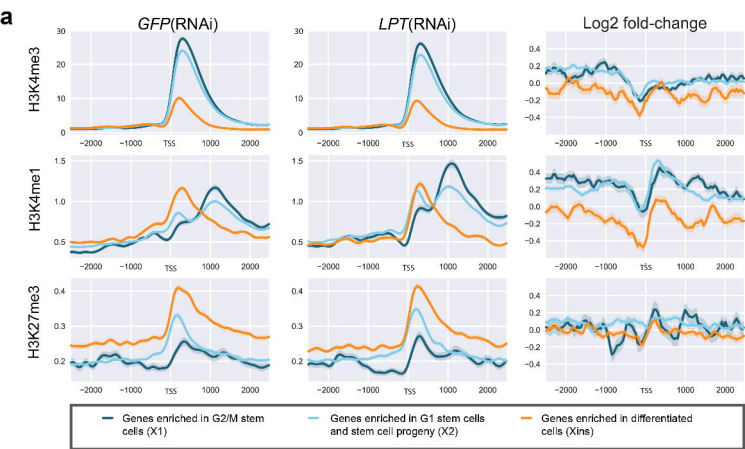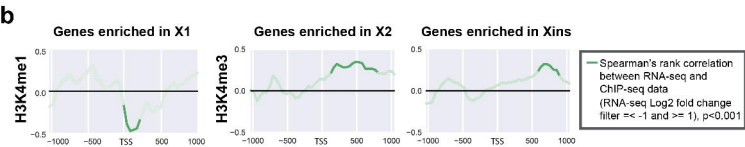



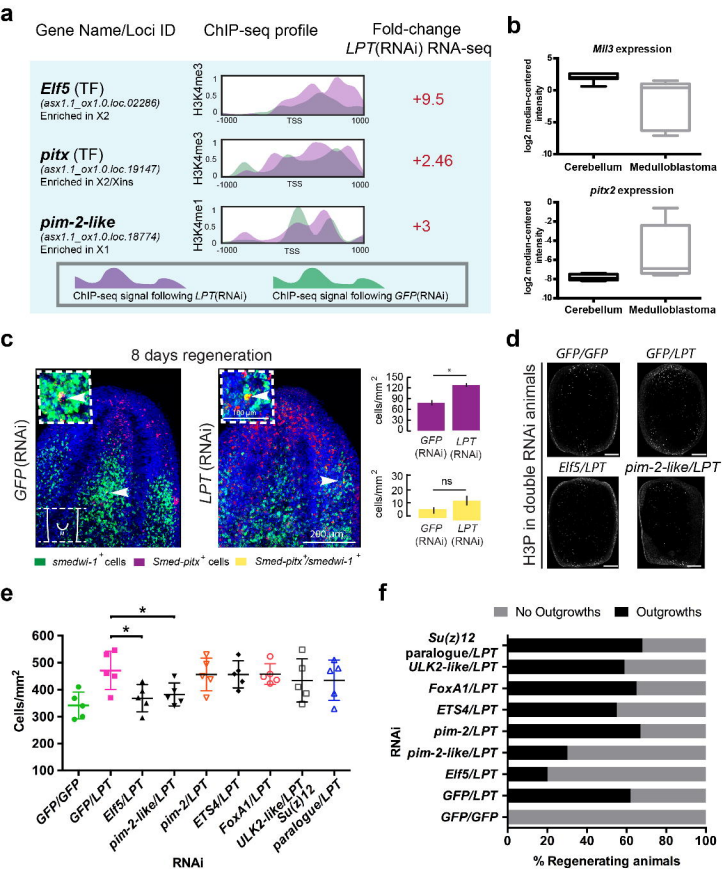

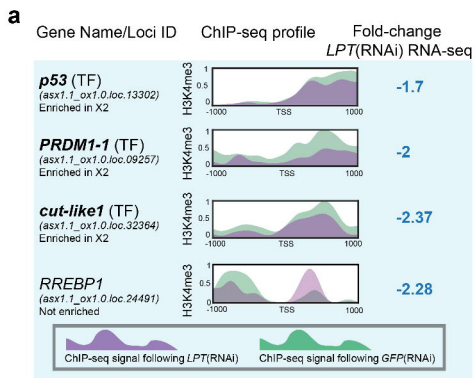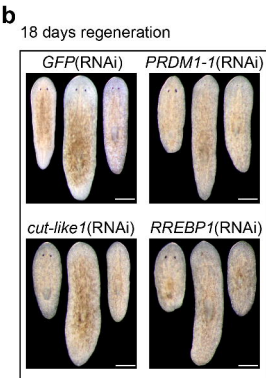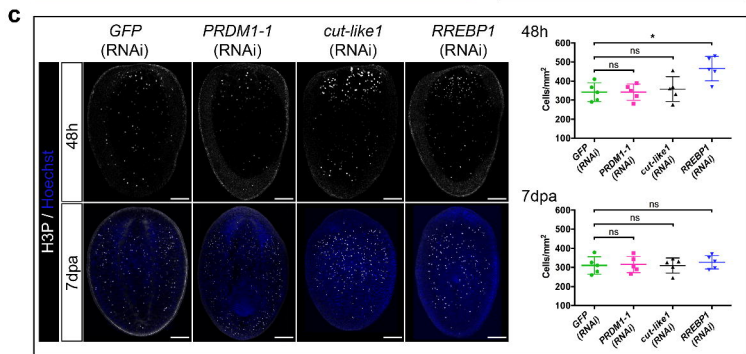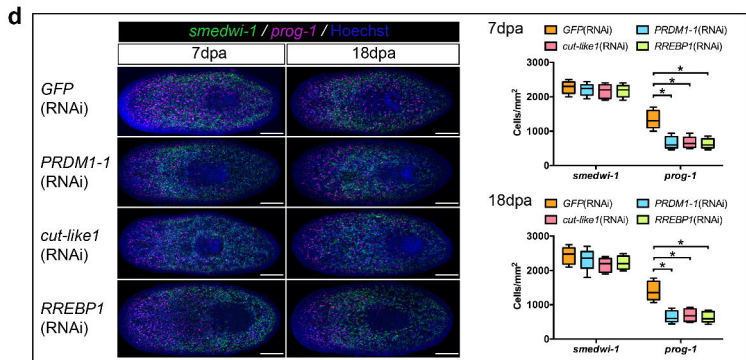

Source: https://www.biorxiv.org/content/10.1101/126540v3.full.pdf
